1 **Genome-wide biases in the rate and molecular spectrum of spontaneous**  
2 **mutations in *Vibrio cholerae* and *Vibrio fischeri***

3  
4 Marcus M. Dillon<sup>a</sup>, Way Sung<sup>b,c</sup>, Robert Sebra<sup>e</sup>, Michael Lynch<sup>c</sup>, and Vaughn S.  
5 Cooper<sup>a,d</sup>

6  
7  
8 <sup>a</sup>Microbiology Graduate Program, University of New Hampshire, Durham, NH, USA

9  
10 <sup>b</sup>Department of Bioinformatics and Genomics, University of North Carolina Charlotte,  
11 Charlotte, NC, USA

12  
13 <sup>c</sup>Department of Biology, Indiana University, Bloomington, IN, USA

14  
15 <sup>d</sup>Department of Microbiology and Molecular Genetics, University of Pittsburgh School of  
16 Medicine, Pittsburgh, PA, USA

17  
18 <sup>e</sup>Department of Genetics and Genomic Sciences and Icahn Institute for Genomics and  
19 Multiscale Biology, Icahn School of Medicine at Mount Sinai, New York, NY, USA

20  
21  
22 **Corresponding Author:**

23 Vaughn Cooper  
24 425 Bridgeside Point II, 450 Technology Drive  
25 Pittsburgh, PA 15219  
26 Phone: (412)-624-1265  
27 Email: [vaughn.cooper@pitt.edu](mailto:vaughn.cooper@pitt.edu)

28  
29  
30 Running Title: Mutation biases in *Vibrio* species

31  
32 Keywords: *Vibrio cholerae*, *Vibrio fischeri*, mutation accumulation, mutation rate,  
33 mutation spectra

34  
35  
36 **Author Contributions:** M.D., W.S., M.L., and V.C. designed the research; M.D., W.S.,  
37 and R.S. performed the research; M.D., and W.S. analyzed the data; and M.D., and  
38 V.C. wrote the paper.

39

## ABSTRACT

40       The vast diversity in nucleotide composition and architecture among bacterial  
41 genomes may be partly explained by inherent biases in the rates and spectra of  
42 spontaneous mutations. Bacterial genomes with multiple chromosomes are relatively  
43 unusual but some are relevant to human health, none more so than the causative agent  
44 of cholera, *Vibrio cholerae*. Here, we present the genome-wide mutation spectra in wild-  
45 type and mismatch repair (MMR) defective backgrounds of two *Vibrio* species, the low-  
46 GC% squid symbiont *V. fischeri* and the pathogen *V. cholerae*, collected under  
47 conditions that greatly minimize the efficiency of natural selection. In apparent contrast  
48 to their high diversity in nature, both wild-type *V. fischeri* and *V. cholerae* have among  
49 the lowest rates for base-substitution mutations (bpsms) and insertion-deletion  
50 mutations (indels) that have been measured, below  $10^{-3}$ /genome/generation. *V. fischeri*  
51 and *V. cholerae* have distinct mutation spectra, but both are AT-biased and produce a  
52 surprising number of multi-nucleotide indels. Furthermore, the loss of a functional MMR  
53 system caused the mutation spectra of these species to converge, implying that the  
54 MMR system itself contributes to species-specific mutation patterns. Bpsm and indel  
55 rates varied among genome regions, but do not explain the more rapid evolutionary  
56 rates of genes on chromosome 2, which likely result from weaker purifying selection.  
57 More generally, the very low mutation rates of *Vibrio* species correlate inversely with  
58 their immense population sizes and suggest that selection may not only have  
59 maximized replication fidelity but also optimized other polygenic traits relative to the  
60 constraints of genetic drift.

61

## INTRODUCTION

62         In 2000, the complete genome sequence of *Vibrio cholerae*, the first bacterial  
63 genome with multiple chromosomes to be completed, was published in *Nature* to  
64 acclaim (Heidelberg et al. 2000). Deemed a “treasure trove” for microbiology and  
65 genomics researchers (Waldor and RayChaudhuri 2000), the *V. cholerae* genome  
66 revealed several intriguing asymmetries between the chromosomes. The larger  
67 chromosome 1 (chr1) is approximately 3 Mb in size and contains most essential genes  
68 and the pathogenicity elements required to cause the disease cholera, whereas the  
69 smaller chromosome 2 (chr2) is approximately 1 Mb and contains few essential genes  
70 but many undefined genes acquired by horizontal transfer (Heidelberg et al. 2000;  
71 Cooper et al. 2010). The plasmid-like origin of replication on chr2 implies that it  
72 originated as a megaplasmid that became entrapped by the translocation of essential  
73 genes, and the greater variation in gene content among strains on chr2 has led many to  
74 speculate that the small chromosome somehow confers an evolutionary advantage in  
75 varied environments, perhaps by being enriched for conditionally useful traits (Schoolnik  
76 and Yildiz 2000). Indeed, this two-chromosome structure is found throughout the  
77 *Vibrionaceae* family, suggesting an uncertain evolutionary advantage in their aquatic  
78 habitats.

79         Subsequent studies of the evolution of *Vibrio* genomes have shown that not only  
80 is chr2 more variable in its content, its conserved genes tend to evolve more rapidly  
81 (Cooper et al. 2010). These elevated evolutionary rates likely stem from a gene dosage  
82 bias between chr1 and chr2 that emerges from their replication timing. Specifically,  
83 replication of chr2 occurs later than chr1, leading to synchronous termination of

84 replication of both chromosomes, even though chr1 is larger (Egan and Waldor 2003;  
85 Duigou et al. 2006; Rasmussen et al. 2007). The earlier replication of two-thirds of chr1  
86 generates a gene dosage bias that can be greatly compounded during rapid growth in  
87 which multiple replication forks are active (Stokke et al. 2011). Consequently, genes  
88 replicated early tend to be expressed more, experience greater purifying selection, and  
89 hence evolve more slowly (Cooper et al. 2010; Morrow and Cooper 2012). Effects of  
90 translocations between chromosomes also support this model: genes moving between  
91 chromosomes tend to exhibit altered expression rates that match their new neighbors  
92 (Morrow and Cooper 2012), and orthologs found on secondary chromosomes are  
93 predisposed to more rapid evolution even when found in related genomes with a single  
94 chromosome (Cooper et al. 2010).

95         While these comparative-genomic studies suggest that replication timing and its  
96 effects on gene dosage may influence the strength of purifying selection (and hence the  
97 fate of genetic variation), evidence also exists that replication timing positively  
98 correlates, albeit weakly, with mutation rates (the origin of variation) in all domains of life  
99 (Stamatoyannopoulos et al. 2009; Chen et al. 2010; Agier and Fischer 2012;  
100 Martincorena et al. 2012). Mutation rates may be non-uniform because of greater rates  
101 of damage, asymmetric nucleotide pools, structural differences affecting polymerase  
102 fidelity, biases in gene expression or replication, or variation in the effectiveness of DNA  
103 repair (Sharp et al. 1989; Zhang and Mathews 1995; Mira and Ochman 2002; Cooper et  
104 al. 2010; Lee et al. 2012). If late-replicated genes experience both weaker purifying  
105 selection and greater mutation rates relative to early-replicated genes, selection could

106 therefore act on genome organization to influence both the origin and fate of genetic  
107 variation.

108         The goal of this study was to examine how mutation rates and spectra vary within  
109 and among chromosomes based on existing models of replication timing in two species  
110 of *Vibrio*, *V. cholerae* and *V. fischeri*. Both species are globally significant and are often  
111 compared to one another because of their marine habitats and similar genome  
112 structures, but contrasting roles in pathogenesis and symbiosis (Goldberg and Murphy  
113 1983; Thompson et al. 2004; Ruby et al. 2005). We also evaluated how the mismatch  
114 repair (MMR) system influenced the rates and spectra of spontaneous mutations in both  
115 organisms by removing the *mutS* gene from each genome. Our approach used the well-  
116 documented method of mutation accumulation (MA) paired with whole-genome  
117 sequencing (WGS) (Behringer and Hall 2016). Using the MA-WGS method, a single  
118 clonal ancestor is used to initiate many replicate lineages that are passaged through  
119 hundreds of single cell bottlenecks before each being subjected to WGS. The  
120 bottlenecking regime minimizes the efficiency of natural selection on mutations, and  
121 when the genome sequences are compared, a nearly unbiased picture of the natural  
122 mutation rates and spectra of the ancestor is revealed. A growing body of MA-WGS  
123 studies in microbes have revealed some general properties of spontaneous mutation  
124 (Lynch et al. 2008; Denver et al. 2009; Ossowski et al. 2010; Lee et al. 2012; Sung et al.  
125 2012; Schrider et al. 2013; Heilbron et al. 2014; Long et al. 2014; Zhu et al. 2014; Dillon  
126 et al. 2015; Long et al. 2015; Sung et al. 2015; Dettman et al. 2016), but unique  
127 properties of the spontaneous mutation rates and spectra in many taxa have revealed

128 the value of conducting detailed MA-WGS studies in a more comprehensive collection  
129 of species, particularly those with multiple chromosomes.

130 Here, we performed four detailed MA-WGS experiments on both wild-type and  
131 MMR-deficient strains of *V. fischeri* and *V. cholerae*. We identified a total of 439 wild-  
132 type mutations and 5990  $\Delta mutS$  mutations distributed across both chromosomes of *V.*  
133 *fischeri* and *V. cholerae*, producing the first genome-wide perspective of the bpsm and  
134 indel biases in wild-type and MMR-deficient strains of these two significant bacterial  
135 species. Mutation rates were non-uniform among genome regions and varied in  
136 patterns that appear to be associated with replication timing. Both genomes also  
137 exhibited distinct base-substitution mutation spectra that correlated with their different  
138 %GC content and also experienced a surprising number of multi-nucleotide indel  
139 mutations. Remarkably, the loss of MMR caused both mutation spectra to converge  
140 towards similar patterns dominated by transition mutations and small indels, which  
141 suggests that variation in the MMR system may be partly responsible for producing  
142 differences in genome composition.

143

144

## RESULTS

145 The two ancestral genomes for this study share the two-chromosome  
146 architecture common to *Vibrio* but differ in other important aspects. The genome of *V.*  
147 *fischeri* strain ES114, which was completely sequenced previously, harbors two  
148 chromosomes of 2.90 Mb and 1.33 Mb that differ slightly in their %GC content (38.96%  
149 for chr1 and 37.02% for chr2). In addition, *V. fischeri* ES114 has a 45.85 Kb plasmid  
150 with a %GC content of 38.44% (Ruby et al. 2005). The genome of *V. cholerae* strain

151 2740-80, which was previously deposited as a draft assembly, was closed and polished  
152 for this study using a combination of PacBio sequencing, Illumina sequencing, and  
153 consensus assemblies (see Methods). This *V. cholerae* genome includes a 2.99 Mb  
154 primary chromosome (chr1) and a 1.10 Mb secondary chromosome (chr2), with %GC  
155 contents of 47.85% and 46.83%, respectively. Four MA experiments were conducted  
156 with these strains using daily single-cell bottlenecks produced by isolation-streaking on  
157 agar plates, which limits the efficiency of natural selection to purge deleterious and  
158 enrich beneficial mutations. For the two wild-type (wt) experiments, *V. fischeri* ES114  
159 (*Vf*-wt) and *V. cholerae* 2740-80 (*Vc*-wt) colonies were used to found 75 MA lineages,  
160 each of which was propagated for 217 days. For the two mutator (mut) experiments, *V.*  
161 *fischeri* ES114 (*Vf*-mut) and *V. cholerae* 2740-80 (*Vc*-mut) strains lacking a *mutS* gene  
162 were used to found 48 MA lineages, each of which was propagated for 43 days. The  
163 properties of each of these experiments, the observed mutation spectra, and the lack of  
164 genetic parallelism suggest that few of these mutations were subject to the biases of  
165 natural selection (Supplemental Text). Summary parameters of each MA experiment,  
166 including the numbers of mutations identified in all final isolates, generations of growth,  
167 and overall mutation rates are summarized in Table 1. Owing to the fitness cost of  
168 increasing mutational load, generations of growth per day declined over the course of  
169 each MA experiment, particularly in the mutator lineages (Figure S1).

170

171 **Wild-type base-substitution mutation rates and spectra.** The wild-type base-  
172 substitution mutation rates for these *Vibrio* species are among the lowest per-generation  
173 rates that have been observed in any organism (Figure S2). The bpsm rate for *V.*

174 *fischeri* is  $2.07 (0.207) \cdot 10^{-10}$  /bp/generation (SEM), which is approximately twice the  
175 rate of bpsm in *V. cholerae*,  $1.07 (0.094) \cdot 10^{-10}$  /bp/generation (SEM). These per-site  
176 bpsm rates correspond to genome-wide bpsm rates of 0.0009 /genome/generation for  
177 *V. fischeri* and 0.0004 /genome/generation for *V. cholerae*. (Table 1). Bpsm rates differ  
178 somewhat between the chromosomes of *V. fischeri*, with chr2 experiencing significantly  
179 greater rates than chr1 ( $\chi^2 = 4.799$ , d.f. = 1,  $p = 0.028$ ), but no difference was found  
180 between the chromosomes of *V. cholerae* ( $\chi^2 = 0.556$ , d.f. = 1,  $p = 0.456$ ) (Figure 1A).  
181 The increased bpsm rate on chr2 of *V. fischeri* cannot be explained by the relative  
182 nucleotide contents of the chromosomes (%GC: chr1, 39.0%; chr2, 37.0%). In fact,  
183 when we account for AT-biased mutation in *V. fischeri*, the difference between the  
184 expected and observed bpsms between the two chromosomes increased ( $\chi^2 = 5.747$ ,  
185 d.f. = 1,  $p = 0.017$ ). Correcting for AT-biased mutation in *V. cholerae* (%GC: chr1,  
186 47.9%; chr2, 46.8%) revealed no significant difference between the bpsm rates of chr1  
187 and chr2 ( $\chi^2 = 0.123$ , d.f. = 1,  $p = 0.726$ ).

188 Base-substitution mutation spectra in both *V. fischeri* and *V. cholerae* were  
189 significantly AT-biased (*Vf*:  $\chi^2 = 108.090$ , d.f. = 1,  $p < 0.0001$  ; *Vc*:  $\chi^2 = 28.744$ , d.f. = 1,  
190  $p < 0.0001$ ) (Figure 1C). Interestingly, the AT-bias is stronger in *V. fischeri*, which has  
191 the lower genome wide %GC-content. However, consistent with previous MA studies of  
192 bacteria (Lind and Andersson 2008; Lee et al. 2012; Sung et al. 2012; Dillon et al. 2015;  
193 Sung et al. 2015; Dettman et al. 2016), AT-mutation bias alone fails to explain realized  
194 genome-wide %GC-contents. For *V. fischeri*, the expected %GC-content under  
195 mutation-drift equilibrium is  $0.202 \pm 0.034$  (SEM), 0.182 lower than the genome-wide  
196 %GC-content (0.384). This AT-bias is generated by high relative bpsm rates of both



197 G:C > A:T transitions and G:C > T:A transversions, but it is the relative G:C > T:A  
198 transversion rate that is especially high in comparison to MA studies in other species.  
199 With a rate of  $9.19 \cdot 10^{-9}$  /bp/generation, G:C > T:A transversions occur at a higher rate  
200 than any other bpsm, generating a transition/transversion ratio ( $T_S/T_V$ ) of 0.851.  
201 Similarly, the expected %GC content of *V. cholerae* under mutation-drift equilibrium is  
202  $0.281 \pm 0.044$  (SEM), 0.195 lower than the genome-wide %GC content (0.476).  
203 However, in *V. cholerae*, the AT-bias is generated mostly by G:C > A:T transitions  
204 rather than G:C > T:A transversions, resulting in a  $T_S/T_V$  of 1.59.

205 To test whether the bpsm spectra on chr1 were significantly different from those  
206 on chr2, we used the conditional bpsm rates (corrected for %GC-content) of chr1 to  
207 generate expected ratios for each bpsm and compared these with the observed bpsm  
208 spectra on chr2 (Figure 1C). Neither the overall bpsm spectra of *V. fischeri* or *V.*  
209 *cholerae* varied significantly between chromosomes (*Vf*:  $\chi^2 = 7.797$ , d.f. = 5,  $p = 0.168$ ;  
210 *Vc*:  $\chi^2 = 6.516$ , d.f. = 5,  $p = 0.259$ ). However, the G:C > T:A transversion rate was  
211 significantly higher on chr2 of *V. fischeri* (Welch's two tailed t-test;  $t = 2.348$ ,  $df =$   
212  $71.952$ ,  $p = 0.022$ ) and the A:T > G:C transition rate was significantly lower on chr2 of *V.*  
213 *cholerae* (Welch's two tailed t-test;  $t = -2.155$ ,  $df = 95.749$ ,  $p = 0.034$ ) (Figure 1C).  
214 Interestingly, late replicating regions of chr1 in *V. fischeri* (the terminal 1,330,333 bp,  
215 equal to the size of chr2) also had elevated G:C > T:A transversion rates, and late  
216 replicating regions of chr1 in *V. cholerae* (terminal 1,101,931 bp, equal to the size of  
217 chr2) had reduced A:T > G:C transition rates relative to early replicating regions, though  
218 neither of these intra-chromosomal differences were significant (Welch's two tailed t-  
219 test; *Vf* G:C>T:A  $T_V$ :  $t = 1.789$ ,  $df = 81.645$ ,  $p = 0.077$ ; *Vc* A:T > G:C  $T_S$ :  $t = -0.720$ ,  $df =$

220 95.489,  $p = 0.473$ ). Bpsm rates of other mutation types in late replicating regions of chr1  
221 do not conform to those on chr2 (Table S1), suggesting that not all bpsms are  
222 influenced by replication timing.

223  
224 **Wild-type insertion-deletion mutation rates.** Indels occurred at approximately one-  
225 fifth the rate of bpsm and occurred predominantly in simple sequence repeats (SSRs).  
226 Cumulative indel mutation rates for *V. fischeri* and *V. cholerae* were  $5.68 (0.691) \cdot 10^{-11}$   
227 /bp/generation and  $1.71 (0.337) \cdot 10^{-11}$  /bp/generation (SEM), respectively (Table 1).  
228 These rates correspond to genome-wide indel rates of 0.0002 /genome/generation for  
229 *V. fischeri* and 0.00007 /genome/generation for *V. cholerae* (Table 1). The indel spectra  
230 of both species were biased towards deletions, with deletions occurring at  
231 approximately twice the rate of insertions in *V. fischeri* ( $\chi^2 = 4.267$ , d.f. = 1,  $p = 0.039$ ),  
232 and three times the rate of insertions in *V. cholerae* ( $\chi^2 = 6.546$ , d.f. = 1,  $p = 0.011$ )  
233 (Figure 1). Indels were also significantly more frequent on chr1 in *V. fischeri* ( $\chi^2 = 9.066$ ,  
234 d.f. = 1,  $p = 0.003$ ) and slightly more common on chr1 in *V. cholerae* ( $\chi^2 = 0.123$ , d.f. =  
235 1,  $p = 0.726$ ), though not significantly so (Figure 1B).

236 In contrast with previous reports from bacterial MA-WGS studies, we find many  
237 multi-nucleotide indels in both the *Vf*-wt and *Vc*-wt MA experiments. In *Vf*-wt, only  
238 20.00% of indels involved the insertion or deletion of a single nucleotide, while 36.36%  
239 of the *Vc*-wt indels involved a single nucleotide. Furthermore, the distribution of the  
240 number of indels identified for each length below 10-bps demonstrates that short multi-  
241 nucleotide indels were relatively common, particularly in *V. fischeri* (Figure 2).

242 More strikingly, in *V. fischeri*, the indel rates of SSRs scaled positively with the  
243 repeat unit length and the number of repeated units. 41 of the 60 indels (68.33%)  
244 observed in *V. fischeri* occurred in SSRs containing three or more repeated units, which  
245 is significantly more than we expect based on the frequency of bases in SSRs in the *V.*  
246 *fischeri* genome ( $\chi^2 = 82.915$ , d.f. = 1,  $p < 0.0001$ ). When SSRs are categorized by their  
247 repeat unit length (mono-, di-, tri-nucleotide, etc.), SSRs with longer repeat units  
248 experience elevated mutation rates (Figure 3). Importantly, these rates vary over orders  
249 of magnitude and their observed frequencies differ significantly from the null expectation  
250 derived from their target sizes ( $\chi^2 = 2.120 \cdot 10^5$ , d.f. = 8,  $p < 0.0001$ ). SSR indel rates  
251 also scale positively with the number of repeats in the SSR and again differ significantly  
252 from the null expectation derived from their genome target (Chi-square test, repeat  
253 numbers 3-10;  $\chi^2 = 5.590 \cdot 10^2$ , d.f. = 7,  $p < 0.0001$ ). Lastly, a few SSRs appear to be  
254 especially mutagenic because the same locus mutated independently in multiple  
255 lineages (Supplementary Dataset 2). We cannot ascertain whether similar SSR biases  
256 exist in *V. cholerae* because only 22 indels were observed and only 8 of those were in  
257 SSRs with three or more repeats (36.36%). However, the elevated occurrence of indels  
258 in SSRs in *V. cholerae* is consistent with our observations in *V. fischeri* ( $\chi^2 = 4.547$ , d.f.  
259 = 1,  $p = 0.033$ ).

260

261 **Effects of losing DNA mismatch repair.** The deletion of the *mutS* gene results in a  
262 faulty MMR system and is expected to increase the rates and alter the spectra of bpsms  
263 and indels. In *V. fischeri*,  $\Delta mutS$  produced a 317-fold increase in the bpsm rate and a  
264 102-fold increase in the indel rate (Table 1). This  $\Delta mutS$  mutation also eliminated

265 differences between chromosomes in both bpsm and indel rates observed in the *Vf*-wt  
266 lineages (bpsm:  $\chi^2 = 0.109$ , d.f. = 1,  $p = 0.741$ ; indels:  $\chi^2 = 2.076$ , d.f. = 1,  $p = 0.150$ ). In  
267 *V. cholerae*, the *mutS* deletion produced an 85-fold increase in the bpsm rate and a  
268 142-fold increase in the indel rate (Table 1). However, in this case, slightly more bpsm  
269 occurred on chr1 in *Vc-mut* lineages than expected (bpsm:  $\chi^2 = 4.540$ , d.f. = 1,  $p =$   
270  $0.0331$ ; indels:  $\chi^2 = 0.041$ , d.f. = 1,  $p = 0.840$ ).

271 Losing functional mismatch repair caused the bpsm spectra of both *V. fischeri*  
272 and *V. cholerae* to change dramatically and converge (Figure 4). Despite the  
273 significantly different bpsm spectra between wild-type species ( $\chi^2 = 32.788$ , d.f. = 5,  $p <$   
274  $0.0001$ ), the loss of *mutS* caused *Vf*-mut and *Vc*-mut lineages to accumulate a  
275 remarkably similar spectrum of bpsms ( $\chi^2 = 10.178$ , d.f. = 5,  $p = 0.070$ ). Specifically,  
276 both sets of mutator lines were dominated by A:T > G:C and G:C > T:A transitions,  
277 which would yield significantly more %GC-rich genomes of  $0.482 \pm 0.016$  (SEM) in *Vf*-  
278 mut and  $0.475 \pm 0.011$  (SEM) in *Vc*-mut at mutation-drift equilibrium. In addition, while  
279 *V. fischeri* continues to have a slight deletion bias with defective MMR, insertions  
280 actually occur at a slightly higher rate than deletions in the *Vc*-mut lineages, although  
281 not significantly so (*Vf*-mut:  $\chi^2 = 6545$ , d.f. = 1,  $p = 0.011$ ; *Vc*-mut:  $\chi^2 = 0.297$ , d.f. = 1,  $p$   
282  $= 0.586$ ). Lastly, as with the wild-type lineages, the bpsm spectra do not vary  
283 significantly between chromosomes for either MMR deficient species (*Vf*-mut:  $\chi^2 =$   
284  $8.929$ , d.f. = 1,  $p = 0.112$ ; *Vc*-mut:  $\chi^2 = 5.239$ , d.f. = 1,  $p = 0.387$ ).

285 While multi-nucleotide indels were relatively common in the wild-type MA lines,  
286 the vast majority of indels involved a single nucleotide in both the *Vf*-mut (93.62%) and  
287 *Vc*-mut (85.66%) lines (Figure 2). The *mutS* deletion increased the single-nucleotide

288 indel rate 473-fold but the multi-nucleotide indel rate only 13-fold in *V. fischeri*. Similar  
289 patterns were seen in *V. cholerae*, where  $\Delta mutS$  increased the single-nucleotide indel  
290 rate 334-fold and the multi-nucleotide indel rate only 64-fold. Most of the increase in the  
291 multi-nucleotide mutation rate resulted from di- and tri-nucleotide indels that were rarely  
292 observed in the wild-type MA experiments (Figure 2). Yet all indels detected in the  
293 mutator MA experiments up to 10-bps in length were also significantly over-represented  
294 in mutator MA experiments (Table S2), implying that *mutS* and the MMR system in  
295 general are involved in the repair of all indel mutations up to 10-bps in length.

296 Most single-nucleotide indels in *Vf*-mut and *Vc*-mut lines occurred in  
297 homopolymeric runs. The single-nucleotide indel mutation rate in both *Vf*-mut and *Vc*-  
298 mut correlates positively with the length of the homopolymer (Figure 5) and differs  
299 significantly from the null expectation derived from the genome target size (Chi-square  
300 test, repeat numbers 3-11; *Vf*-mut:  $\chi^2 = 3.189 \times 10^4$ , d.f. = 8,  $p < 0.0001$ ; *Vc*-mut:  $\chi^2 =$   
301  $6.850 \times 10^4$ , d.f. = 8,  $p < 0.0001$ ). Because indels in SSRs with longer repeated units  
302 were rarely observed in the mutator lineages, we cannot confirm whether the length of  
303 the repeated unit in an SSR also correlates positively with its indel rate in either of the  
304 mutator lineages.

305  
306 **Genomic distribution of spontaneous mutations.** To this point we have only  
307 discussed inter-chromosomal differences in mutation rates between two autonomously  
308 replicating chromosomes. However, the distribution of bpsms and indels in *V. fischeri*  
309 and *V. cholerae* may also vary among regions within these circular chromosomes. We  
310 analyzed the genome-wide distribution of bpsms by dividing each chromosome into 100

311 kb intervals extending bi-directionally from the origin of replication. Despite apparent  
312 intra-chromosome variation in the bpsm rate of both wild-type ancestors (Figure 6A,B),  
313 the observed number of bpsms in 100kb intervals does not differ significantly from  
314 random expectations based on the number of analyzed sites (*Vf*-wt Chr1:  $\chi^2 = 31.254$ ,  
315 d.f. = 29,  $p = 0.354$ ; *Vf*-wt Chr2:  $\chi^2 = 17.185$ , d.f. = 15,  $p = 0.308$ ; *Vc*-wt Chr1:  $\chi^2 =$   
316  $29.607$ , d.f. = 29,  $p = 0.434$ ; *Vc*-wt Chr2:  $\chi^2 = 12.825$ , d.f. = 11,  $p = 0.305$ ). However,  
317 bpsms were not distributed evenly on chr1 in either of the mutator experiments (*Vf*-mut:  
318  $\chi^2 = 132.970$ , d.f. = 29,  $p < 0.0001$ ; *Vc*-mut:  $\chi^2 = 102.420$ , d.f. = 29,  $p < 0.0001$ ),  
319 resulting in a mirrored wave-like pattern of bpsm rates on the right and left replichores  
320 (Figure 6A,B). Indeed, we find a significant positive relationship between the bpsm rates  
321 on the right replichore and concurrently replicated regions on the left replichore in both  
322 genomes (Linear regression; *Vf*-mut:  $F = 10.98$ ,  $df = 13$ ,  $p = 0.0060$ ,  $r^2 = 0.46$ ; *Vc*-mut:  $F$   
323  $= 6.76$ ,  $df = 13$ ,  $p = 0.0221$ ,  $r^2 = 0.34$ ). In contrast to chr1, the observed distribution of  
324 bpsms on chr2 of the *V. fischeri* and *V. cholerae* mutator lineages does not differ from a  
325 null, constant rate among regions (*Vf*-mut:  $\chi^2 = 17.459$ , d.f. = 15,  $p = 0.292$ ; *Vc*-mut:  $\chi^2$   
326  $= 10.984$ , d.f. = 11,  $p = 0.445$ ), suggesting that bpsm rates are more consistent across  
327 chr2 than they are on chr1 (Figure 6A, B).

328 Indels occur predominantly in SSRs, which are not uniformly distributed across  
329 the genome, and are thus also expected to vary significantly between genome regions.  
330 This variation was seen in all experiments except *Vc*-wt, likely because only 22 indels  
331 were detected in this experiment (Figure 6 C,D) (*Vf*-wt:  $\chi^2 = 83.079$ , d.f. = 43,  $p <$   
332  $0.0001$ ; *Vc*-wt:  $\chi^2 = 42.224$ , d.f. = 41,  $p = 0.418$ ; *Vf*-mut:  $\chi^2 = 96.383$ , d.f. = 43,  $p <$   
333  $0.0001$ ; *Vc*-mut:  $\chi^2 = 157.240$ , d.f. = 41,  $p < 0.0001$ ). However, indel rates were not

334 conserved on opposing replichores of either chromosome and were rather dispersed  
335 throughout the genomes.

336

337

## DISCUSSION

### 338 **Causes and effects of high genetic diversity within *Vibrio***

339 The unique and broadly significant biology of both *V. cholerae* and *V. fischeri*  
340 motivated this comprehensive study of their mutational processes in the near-absence  
341 of natural selection. *V. cholerae* is one of the most significant human pathogens,  
342 infecting 3-5 million people and causing approximately 100,000 deaths annually from  
343 side effects of the profuse diarrhea caused by toxigenic strains (Lozano et al Lancet  
344 2012). *V. cholerae* also lives in a broad range of aquatic habitats associated with  
345 zooplankton and is often highly abundant, demonstrating that only a small number of  
346 strains are capable of causing cholera. This ecological diversity is borne out in the  
347 genetic diversity seen in sequenced genomes, namely a high nucleotide diversity at  
348 silent sites ( $\pi_s = 0.110$ ) (Sung et al. 2016). This nucleotide diversity implies that the  
349 effective population size ( $N_E$ ) of this species is  $\approx 4.78 \times 10^8$  individuals.

350 *V. fischeri*, in apparent contrast, is well known as a beneficial symbiont of sepiolid  
351 squid and monocentrid fishes, in which it produces light that enables the host to evade  
352 predators by counter-illumination (Soto et al. 2014). The hosts it colonizes are  
353 distributed in different oceans around the world, but it can also be found as a free-living  
354 member of the ocean bacterioplankton (Soto et al. 2014). Here also the ecological  
355 diversity is borne out by high genetic diversity at a number of loci, with estimated  $\pi_s =$   
356 0.067 and an inferred  $N_E$  of  $\approx 1.62 \times 10^8$  (Wollenberg and Ruby 2012). For both species,



357 and for the *Vibrionaceae* more generally, what forces lead to such high genetic diversity  
358 within species?

359 Both mutation and horizontal-gene transfer (HGT) are expected to contribute to  
360 *Vibrio* biodiversity, but evidence exists that mutation is the primary force driving  
361 diversification within *Vibrio* clades (Thompson et al. 2004; Sawabe et al. 2009; Vos and  
362 Didelot 2009). It has therefore been tempting to invoke high mutation rates in *Vibrio*  
363 species to explain their high genetic diversity. However, we show here that both bpsm  
364 and indel rates in *V. fischeri* and *V. cholerae* are low, even for bacteria (Figure S2). In  
365 fact, *V. cholerae* has one of the lowest recorded genome-wide rates of bpsms (0.0004  
366 /genome/generation) and indels (0.00007 /genome/generation) of any bacterial species  
367 (Sung et al. 2016). We suggest that the high genetic diversity and low mutation rates in  
368 these *Vibrio* species can be reconciled by the drift-barrier hypothesis, which states  
369 generally that any trait, including replication fidelity, may be refined by natural selection  
370 only to the point at which further improvement becomes overwhelmed by the power of  
371 genetic drift (Lynch 2010; Lynch 2011; Sung et al. 2012; Sung et al. 2016). Natural  
372 selection is most powerful in large populations of organisms with genomes composed of  
373 a high amount of coding sequence. Although *Vibrio* genomes are not exceptionally  
374 large, most sites are coding and their effective population sizes are among the highest  
375 recorded (Wollenberg and Ruby 2012; Sung et al. 2016). Thus, both high amounts of  
376 coding sequence and high effective population size increase the ability of natural  
377 selection to reduce both bpsm and indel rates (Lynch 2010; Lynch 2011; Sung et al.  
378 2012), yet yield enormous allelic diversity at any given time in both of these *Vibrio*  
379 species (Thompson et al. 2004; Vos and Didelot 2009).



380           If the extremely low mutation rates of these *Vibrio* species are a product of  
381 powerful selection enabled by massive populations to refine the machinery of DNA  
382 replication, it follows that many other heritable traits may have also been optimized in  
383 these organisms. One of the best known *Vibrio* traits is their extremely rapid growth  
384 rates, with several species achieving doubling times of 10-15 minutes (Brenner et al.  
385 2005). Growth rate is a broad polygenic character requiring the coordination of  
386 essentially all systems, including ribosome synthesis, catabolic and anabolic pathways,  
387 and of course, replication. *Vibrio* species are also typified by having genomes with two  
388 chromosomes, which provide two origins of replication that could conceivably accelerate  
389 DNA replication. This genome architecture has clearly been refined by selection for  
390 rapid growth: not only does the experimental reduction of the *V. cholerae* genome from  
391 two chromosomes to one decrease growth rates by 25-40% (Val et al. 2012), the early-  
392 replicating chr1 is enriched relative to chr2 in genes required for rapid growth relative  
393 (Cooper et al. 2010). Other *Vibrio* traits (metabolism, regulatory capacity in fluctuating  
394 environments, stress tolerance) in addition to their high-fidelity replication and rapid  
395 growth may also conceivably have been exceptionally refined by selection. Put more  
396 broadly, the drift-barrier hypothesis may be extended and applied to many traits,  
397 rendering the prediction that DNA replication fidelity and the optimality of many other  
398 phenotypes may be positively correlated – the lower the mutation rate, the more  
399 selectively optimized the polygenic trait.

400

401 **Mutation rate and spectra variation among genome regions**

402 This hypothesis that *Vibrio* replication has been exquisitely optimized relative to  
403 other bacterial genomes because of their high coding content and high effective  
404 population sizes does not mean that all regions of *Vibrio* genomes have been  
405 equivalently refined relative to one another. Both bpsm and indel rates and spectra  
406 varied among genomic regions of *V. fischeri* and *V. cholerae*, which may systematically  
407 affect genome composition. In the *Vf*-wt lines, both G:C > A:T transitions and G:C > T:A  
408 transversions occurred at higher rates on chr2, although only the rate of G:C > T:A  
409 transversions was significantly higher (Figure 1C). Using experiment-wide estimates of  
410 each conditional bpsm rate in *V. fischeri*, we estimate that the %GC-content should be  
411 0.184 in the absence of selection and recombination. Yet, the %GC-content of chr2 is  
412 expected to be 0.156 at mutation-drift equilibrium, 0.047 lower than expectations for  
413 chr1 (0.203). The actual %GC content of chr2 of the *V. fischeri* ES114 genome is also  
414 lower than chr1 (chr1: 0.390; chr2: 0.370) suggesting that bpsm biases on these  
415 chromosomes have contributed to this pattern. Even stronger biases differentiating the  
416 chromosomes are seen in the *Vc*-wt lines, driven by significantly higher A:T > G:C  
417 transition rates on chr1 and by non-significant increases in G:C > A:T and G:C > T:A  
418 rates on chr2 (Figure 1C). These spectra predict %GC-contents of 0.293 for chr1 and  
419 0.201 for chr2 at mutation-drift equilibrium and likely contribute to the lower realized  
420 %GC content of chr2 in *V. cholerae* 2740-80 (chr1: 0.479; chr2: 0.468). Overall, these  
421 findings suggest that bpsm pressures contribute to genome-wide and intra-genome  
422 variation in %GC contents, but indel biases (Dillon et al. 2015), selection (Hershberg  
423 and Petrov 2010; Hildebrand et al. 2010), and/or biased gene conversion (Hershberg

424 and Petrov 2010; Lassalle et al. 2015) must also contribute to the realized %GC  
425 contents in *V. fischeri* and *V. cholerae*.

426 Prior MA studies have reported that the majority of indels involve the loss or gain  
427 of a single nucleotide and occur predominantly in simple-sequence repeats (SSRs),  
428 where the number of repeated units scales positively with the indel rate (Xu et al. 2000;  
429 Lee et al. 2012; Long et al. 2014; Dettman et al. 2016). These SSRs have gained  
430 attention not only because they vary sufficiently in repeat number among strains to  
431 enable rapid genotyping (van Belkum et al. 1998; Danin-Poleg et al. 2007; Ghosh et al.  
432 2008), but also because in some species they associate with variable heritable  
433 expression of genes related to host colonization and disease (Moxon et al. 1994; Field  
434 et al. 1999; Moxon et al. 2006), begging the question of whether these mutation-prone  
435 sequences have indirectly evolved to enable this plasticity.

436 In *V. fischeri*, the insertion-deletion rates in SSRs correlated positively with both  
437 the number of repeated units and the length of the repeated unit (Figure 2). While the  
438 former bias is consistent with a number of previous studies (Xu et al. 2000; Lee et al.  
439 2012; Long et al. 2014; Dettman et al. 2016), the positive correlation between the length  
440 of the repeated unit in an SSR and its indel rate has not been reported in previous MA-  
441 WGS experiments. One possible reason for this discrepancy might be an increased  
442 occurrence of SSRs with longer repeats in the *V. fischeri* ES114 genome (Ruby et al.  
443 2005), which we find to be highly mutagenic (Figure 3). There are 100 SSRs of three or  
444 more units in the *V. fischeri* ES114 genome where the repeated unit is at least 4-bps in  
445 length. A second possibility is that larger indels have gone undetected by prior MA-  
446 WGS analyses focused on MMR-deficient strains, in which single-nucleotide indels are

447 evidently more common (Supplementary Dataset 2). Further, longer indels, especially  
448 those in SSRs, are subject to increased false-negative rates due to limitations in the  
449 ability of short-read sequencing to resolve them. The majority of multi-nucleotide indels  
450 that we identified were supported with very low consensus in the initial alignments  
451 because of reads that only partly covered the SSR. Only when we filtered out reads that  
452 were not anchored by bps on both sides of the SSR did we achieve high consensus for  
453 these indels (Supplementary Dataset 2). It will be interesting to apply these sensitive  
454 detection methods for long SSR-associated indels to future experiments to see whether  
455 other species also experience elevated indel rates in SSRs with longer repeat units. We  
456 emphasize that this experiment also demonstrates that the loss of MMR shifts the  
457 spectrum of indel mutations from multi-nucleotide indels in SSRs with longer repeated  
458 units towards single nucleotides in homopolymeric runs, a shift with potentially broad  
459 phenotypic consequences.

460 Our study adds to the theory that SSRs may generate localized hyper-mutation in  
461 coding regions that may serve as “contingency loci,” enabling potentially beneficial  
462 population-level variation in both function and expression of the affected genes (van  
463 Belkum et al. 1998; Moxon et al. 2006). These experiments, particularly those  
464 conducted in a  $\Delta mutS$  background, identified clusters of frameshift mutations found  
465 within genes that could yield adaptive mutant phenotypes in *Vibrio* populations (Table  
466 2). Some in fact have previously been reported to be hypermutable in experimental  
467 studies of bacterial function. In *V. cholerae*, *tcpH* is an important co-regulator that links  
468 temperature and pH to control expression of the major virulence regulon (Carroll et al.  
469 1997). During experimental infections of the rabbit model, *tcpH* frameshift mutations

470 occurred at a frequency of  $10^{-4}$  owing to mutations in the same poly-G tract that  
471 accumulated in our experiment and they enhanced fitness in culture, which the authors  
472 speculated could reflect a benefit during dispersal from the host into the environment  
473 (Carroll et al. 1997). Another locus, *mshQ*, encodes a pilus-associated adhesion  
474 protein, in which mutants have reported to contribute to the rapid transition between  
475 opaque and translucent colonies in *Vibrio* species (Enos-Berlage et al. 2005). These  
476 colony types associate with different dynamics of biofilm formation in the laboratory and  
477 may reflect different capacity for attachment to natural substrates or other cells,  
478 facilitating biofilm differentiation (Yildiz and Visick 2009). Yet another mutagenic  
479 homopolymeric tract potentially generating population heterogeneity in biofilm  
480 production was found in *vpsT* in *V. fischeri*, a transcriptional activator that regulates  
481 polysaccharide production (Yildiz and Visick 2009). Other hypermutable  
482 mononucleotide tracts were observed in 14 other loci in the *V. cholerae* and *V. fischeri*  
483  $\Delta mutS$  lines and were enriched in genes responsible for biofilm production, including  
484 putative diguanylate cyclases that affect the regulation of biofilm traits via the  
485 messenger molecule cyclic diguanylate and (Yildiz and Visick 2009). Taken together,  
486 this study shows that despite inherently very low mutation rates, *Vibrio* populations likely  
487 harbor genetic variation at SSR's that affect traits in which plasticity may be beneficial –  
488 such as virulence or adherence mechanisms – and this is especially the case for  
489 populations with defective mismatch repair.

490

491 **The role of mismatch repair in genome evolution**

492           The mismatch repair pathway is a primary DNA repair pathway in organisms  
493 across the tree of life (Kunkel and Erie 2005), but strains lacking MMR are common in  
494 nature (Hazen et al. 2009), chronic infections (Hall and Henderson-Begg 2006; Mena et  
495 al. 2008; Oliver 2010; Marvig et al. 2013), or long-term evolution experiments  
496 (Sniegowski et al. 1997). Loss of a functional MMR system can elevate mutation rates  
497 anywhere from 5 to 1000-fold, depending on both the defective component of the  
498 pathway and the genetic background (Lyer et al. 2006; Long et al. 2015; Reyes et al.  
499 2015). The primary proteins involved in the MMR pathway in bacteria include the MutS  
500 protein, which binds mismatches to initiate repair, the MutL protein, which coordinates  
501 multiple steps of MMR synthesis, and the MutH protein, which nicks the unmethylated  
502 strand to remove the replication error (Kunkel and Erie 2005). The removal of the *mutS*  
503 gene in this study resulted in a 317-fold increase in the bpsm rate and a 102-fold  
504 increase in the indel rate in *V. fischeri* ES114. The removal of the *mutS* gene in *V.*  
505 *cholerae* had a less dramatic effect on the bpsm rate (85-fold increase), but a more  
506 dramatic effect on the indel rate (142-fold increase). Overall, this suggests that MMR is  
507 more central to the repair of bpsms in *V. fischeri*, while it is more important for the repair  
508 of indels in *V. cholerae*.

509           Despite the relatively wide range in the consequences of losing a functional MMR  
510 system for bpsm rates, the resulting bpsm spectra were remarkably similar in *V. fischeri*  
511 and *V. cholerae*. Specifically, unlike the wild-type experiments, the bpsm spectra of the  
512 *Vf-mut* and *Vc-mut* MA experiments were not significantly different, as both were  
513 dominated by G:C > A:T and A:T > G:C transitions. Furthermore, the vast majority of  
514 indels in the both the *Vf-mut* and *Vc-mut* experiments involve only a single-nucleotide,

515 most of which occurred in homopolymers, where their rates scaled positively with the  
516 length of the homopolymer (Figure 5). These observations are consistent with previous  
517 reports in other bacterial MA experiments using MMR-deficient strains (Lee et al. 2012;  
518 Long et al. 2014; Sung et al. 2015; Dettman et al. 2016), but reveal distinct mutation  
519 biases from genotypes with functional MMR. In fact, the strong site-specific biases in  
520 the mutation spectra generated by the loss of MMR (Table 2) may help to explain the  
521 prevalence of mutator alleles in environmental and clinical settings, despite the  
522 inevitable fitness costs of the mutational load. Couce et al. have found that mutator  
523 alleles can modify the distribution of fitness effects of individual beneficial mutations by  
524 enriching a specific spectrum of spontaneous mutations, and impact the evolutionary  
525 trajectories of different strains (Couce et al. 2013; Couce et al. 2015), although the  
526 generality of how mutators influence adaptive dynamics requires further study.

527         The loss of MMR also helps reveal mutation biases associated with the  
528 replicative polymerase that cannot be observed using the low number of mutations  
529 generated in wild-type MA-WGS experiments (Lee et al. 2012; Sung et al. 2015;  
530 Dettman et al. 2016). A mirrored wave-like pattern of bpsm rates on opposing  
531 replichores has now been observed in multiple MMR-deficient species studied by MA-  
532 WGS, although the exact shape and strength of the pattern varies between species  
533 (Foster et al. 2013; Long et al. 2014; Dettman et al. 2016). We find the same mirrored  
534 wave-like pattern of bpsm rates on the opposing replichores of chr1 in MMR-deficient *V.*  
535 *fischeri* and *V. cholerae* (Figure 6A, B) and show that bpsm rates of concurrently  
536 replicating regions of this chromosome are significantly correlated in both genomes.  
537 This suggests that bpsm rates are impacted by genome location and that regions

538 replicated at similar times on opposing replichores experience similar bpsm rates, at  
539 least in MMR-deficient strains. However, we do not observe any significant variation in  
540 the bpsm rates on chr2 (Figure 6A, B). We suggest that bpsm rates are less variable on  
541 chr2 because of their delayed replication. Specifically, chr2 replication is not initiated  
542 until a large portion of chr1 has already been replicated (Egan and Waldor 2003; Duigou  
543 et al. 2006; Rasmussen et al. 2007), which means that chr2 is not replicated during the  
544 primary peaks in the bpsm rate on the opposing replichores of chr1, and thus  
545 experience more consistent bpsm rates across the chromosome. These patterns of  
546 variation in mutation rates among genome regions suggest that it is conceivable that  
547 selection may act to position some genes to avoid regions of higher mutation pressure,  
548 especially in populations of the size and diversity of *Vibrio* species.

549

## 550 **Concluding Remarks**

551 Mutation-accumulation experiments paired with whole-genome sequencing  
552 enable an unprecedented view of genome-wide mutation rates and spectra and reveal  
553 the underlying biases of spontaneous mutation. These underlying biases can explain  
554 why some genome regions evolve more rapidly than others, why the coding content of  
555 different genome regions varies, and perhaps how clonal populations may generate  
556 adaptively diverse progeny. The primary properties of *V. fischeri* and *V. cholerae*  
557 spontaneous mutation that we have identified in this MA-WGS study are: (a) base-  
558 substitution and insertion-deletion mutation rates are low, consistent with other bacterial  
559 species; (b) base-substitution mutation biases vary between chromosomes, but don't  
560 fully explain their realized %GC contents; (c) both the length of repeat units and the



561 number of repeated units in simple-sequence repeats correlate positively with the  
562 insertion-deletion rate of the SSR; (d) loss of a proficient mismatch repair system has  
563 inconsistent effects on base-substitution and indel mutation rates in different taxa, but  
564 consistently generates convergent mutation spectra that are dominated by transitions  
565 and short indels; and (e) base-substitution mutations in strains deficient in mismatch  
566 repair vary in a mirrored wave-like pattern on opposing replichores on chromosome 1,  
567 but variation is limited on chromosome 2. As we uncover properties of spontaneous  
568 mutation in diverse microbes, we can continue to assess the generality of mutational  
569 biases and more accurately evaluate the role of mutation bias in molecular evolution.

570

571

## MATERIALS AND METHODS

572 **Bacterial strains and culture conditions.** The two wild-type MA experiments were  
573 founded from a single clone derived from *V. fischeri* ES114 and *V. cholerae* 2740-80,  
574 respectively. All MA experiments with *V. fischeri* were carried out on tryptic soy agar  
575 plates supplemented with NaCl (TSAN) (30 g/liter tryptic soy broth powder, 20 g/liter  
576 NaCl, 15 g/liter agar) and were incubated at 28°. Frozen stocks of each MA lineage  
577 were prepared at the end of the experiment by growing a single colony overnight in 5ml  
578 of tryptic soy broth supplemented with NaCl (TSBN) (30 g/liter tryptic soy broth powder,  
579 20 g/liter NaCl) at 28° and freezing in 8% DMSO at -80°. For *V. cholerae*, all MA  
580 experiments were carried out on tryptic soy agar plates (TSA) (30 g/liter tryptic soy broth  
581 powder, 15 g/liter agar) and were incubated at 37°. Similarly, frozen stocks were  
582 prepared by growing a single colony from each lineage overnight in 5ml of tryptic soy

583 broth (TSB) (30 g/liter tryptic soy broth powder) at 37° and were stored in 8% DMSO at -  
584 80°.

585 Mutator strains of *V. fischeri* ES114 and *V. cholerae* 2740-80 were generated by  
586 replacing the *mutS* gene in each genome with an erythromycin resistance cassette, as  
587 described previously (Datsenko and Wanner 2000; Heckman and Pease 2007; Val et al.  
588 2012). Briefly, we used splicing by overlap extension (PCR-SOE) to generate two  
589 erythromycin resistance cassettes, one of which was flanked by  $\approx$  750 bps of the  
590 upstream and downstream regions of the *mutS* gene in *V. fischeri* ES114, while the  
591 second was flanked by  $\approx$  750 bps of the upstream and downstream regions of the *mutS*  
592 gene in *V. cholerae* 2740-80 (Heckman and Pease 2007). Both the *V. fischeri* ES114  
593 and *V. cholerae* 2740-80  $\Delta$ *mutS* fragments were then cloned into the R6K  $\gamma$ -ori-based  
594 suicide vector pSW7848, which contains a *ccdB* toxin gene that is arabinose-inducible  
595 and glucose-repressible ( $P_{BAD}$ ) (Val et al. 2012). Both of these pSW7848 plasmids,  
596 henceforth referred to as pSW7848-*Vf* $\Delta$ *mutS* and pSW7848-*Vc* $\Delta$ *mutS*, were  
597 transformed into *Escherichia coli* pi3813 chemically competent cells and stored at -80°  
598 (Datsenko and Wanner 2000).

599 Conjugal transfer of the pSW7848-*Vf* $\Delta$ *mutS* and pSW7848-*Vc* $\Delta$ *mutS* plasmids  
600 was performed using a tri-parental mating with the *E. coli* pi3813 cells as the donors  
601 (Val et al. 2012), *E. coli* DH5 $\alpha$ -pEVS104 as the helper (Stabb and Ruby 2002), and *V.*  
602 *fischeri* ES114 and *V. cholerae* 2740-80 as the respective recipients. For *V. fischeri*  
603 ES114, the chromosomally inserted pSW7848-*Vf* $\Delta$ *mutS* plasmid resulting from a  
604 crossover at the  $\Delta$ *mutS* gene was selected on LBS plates (Graf et al. 1994) containing  
605 1% glucose and 1ug/ml chloramphenicol at 28°. Selection for loss of the plasmid

606 backbone from a second recombination step was then performed on LBS plates  
607 containing 0.2% arabinose at 28°, which induces the  $P_{BAD}$  promoter of the *ccdB* gene  
608 and ensures that all cells that have not lost the integrated plasmid will die (Val et al.  
609 2012). For *V. cholerae*, the chromosomally inserted pSW7848-*Vc* $\Delta$ *mutS* plasmid was  
610 selected on LB plates (Sambrook et al. 1989) containing 1% glucose and 5ug/ml  
611 chloramphenicol at 30°. Selection for loss of the plasmid backbone was performed on  
612 LB plates with 0.2% arabinose at 30°. Replacement of the *mutS* gene in *V. fischeri*  
613 ES114 and *V. cholerae* 2740-80 were verified by conventional sequencing, and *V.*  
614 *fischeri* ES114  $\Delta$ *mutS* and *V. cholerae* 2740-80  $\Delta$ *mutS* were used to found the two  
615 mutator MA experiments, under identical conditions to those described above for the  
616 wild-type experiments.

617

618 **Ancestral reference genomes.** Prior to this study, the genome of *V. fischeri* ES114  
619 was already in completed form and annotated, consisting of three contigs representing  
620 chr1, chr2, and the 45.85 Kb plasmid (Ruby et al. 2005). Further, the location of the *oriC*  
621 on both chromosomes was available in dOriC 5.0, a database for the predicted *oriC*  
622 regions in bacterial and archaeal genomes (Gao et al. 2013). Fortunately, the *oriC*  
623 region on both chromosomes had been placed at coordinate zero, allowing us to  
624 proceed with this *V. fischeri* ES114 reference genome for all subsequent *V. fischeri*  
625 analyses. In contrast, when we initiated our MA experiment the *V. cholerae* 2740-80  
626 genome was still in draft form, consisting of 257 scaffolds with unknown chromosome  
627 association. Therefore, to reveal inter-chromosomal variation and assess the effects of  
628 genome location on bpsm and indel rates, we used single molecule, real-time (SMRT)

629 sequencing to generate a complete assembly separated into the two contigs of *V.*  
630 *cholerae* 2740-80.

631         The Pacific Biosciences RSII sequencer facilitates the completion of microbial  
632 genomes by producing reads of multiple kilobases (kb) that extend across repetitive  
633 regions and allow whole-genomes to be assembled at a relatively limited cost (Koren  
634 and Phillippy 2015). Genomic DNA (gDNA) was prepared using the Qiagen Genomic-  
635 Tip Kit (20/G) from overnight cultures of *V. cholerae* 2740-80 grown in LB at 37° using  
636 manufacturer's instructions. Importantly, this kit uses gravity filtration to purify gDNA,  
637 which limits shearing and increases the average fragment size of the resulting gDNA  
638 sample. Long insert library preparation and SMRT sequencing was performed on this *V.*  
639 *cholerae* 2740-80 gDNA at the Icahn School of Medicine at Mount Sinai according to  
640 the manufacturer's instructions, as described previously (Beaulaurier et al. 2015).  
641 Briefly, libraries were size selected using Sage Science Blue Pippin 0.75% agarose  
642 cassettes to enrich for long-reads, and were assessed for quantity and insert size using  
643 an Agilent DNA 12,000 gel chip. Primers, polymerases, and magnetic beads were  
644 loaded to generate a completed SMRTbell library, which was run in a single SMRT cell  
645 of a Pacific Biosciences RSII sequencer at a concentration of 75 pM for 180 minutes.

646         As expected, our long insert SMRT sequencing library generated mostly long  
647 reads, with an average sub-read length of 8,401 bps and an N50 of 11,480 bps. We  
648 used the hierarchical genome-assembly process workflow (HGAP3) to generate a  
649 completed assembly of *V. cholerae* 2740-80 and polished our assembly using the  
650 Quiver algorithm (Chin et al. 2013). The resultant assembly consisted of two contigs  
651 representing chr1 and chr2, with an average coverage of 128x. We annotated this

652 assembly using prokka (v1.11), specifying *Vibrio* as the genus (Seemann 2014). We  
653 then identified the location of the *oriC* on both contigs using Ori-finder, which applies  
654 analogous methods to those used by dOriC 5.0 to identify *oriC* regions in bacterial  
655 genomes (Gao and Zhang 2008; Gao et al. 2013). Of course, these *oriC* regions were  
656 not located at coordinate zero of the *V. cholerae* 2740-80 reference genome, so we re-  
657 formatted the reference genome to place each *oriC* region at the beginning of the chr1  
658 and chr2 contigs, then stitched the contigs back together and re-polished the genome  
659 using Quiver. Prokka was then run a second time to update the location of all genes,  
660 and this re-formatted *V. cholerae* 2740-80 genome was used as the ancestral reference  
661 genome for all subsequent *V. cholerae* analyses.

662

663 **MA-WGS Process.** For the two wild-type MA experiments, seventy-five independent  
664 lineages were founded by single cells derived from a single colony of *V. fischeri* ES114  
665 and *V. cholerae* 2740-80, respectively. Each of these lineages was then independently  
666 propagated every 24 hours onto fresh TSAN for *V. fischeri* and fresh TSA for *V.*  
667 *cholerae*. This cycle was then repeated for a total of 217 days. For the two mutator MA  
668 experiments, forty-eight independent lineages were founded and propagated as  
669 described above from a single colony each of *V. fischeri* ES114  $\Delta mutS$  and *V. cholerae*  
670 2740-80  $\Delta mutS$ , respectively. However, because of their higher mutation rates, these  
671 lineages were only propagated for a total of 43 days. At the conclusion of the four MA  
672 experiments, each lineage was grown overnight in the appropriate liquid broth at the  
673 appropriate temperature (see above), and stored at  $-80^{\circ}$  in 8% DMSO.

674 Daily generations were estimated monthly for the wild-type lineages and bi-  
675 monthly for the mutator lineages by calculating the number of viable cells in a  
676 representative colony from 10 lineages per MA experiment following 24 hours of growth.  
677 During each measurement, the representative colonies were placed in 2 ml of  
678 phosphate buffer saline (80 g/liter NaCl, 2 g/liter KCl, 14.4 g/liter Na<sub>2</sub>HPO<sub>4</sub> • 2H<sub>2</sub>O, 2.4  
679 g/liter KH<sub>2</sub>PO<sub>4</sub>), serially diluted, and spread plated on TSAN or TSA for *V. fischeri* and  
680 *V. cholerae*, respectively. These plates were then incubated for 24 hours at 28° or 37°,  
681 and the daily generations per colony were calculated from the number of viable cells in  
682 each representative colony. The average daily generations were then calculated for  
683 each time-point using the ten representative colonies, and the total generations elapsed  
684 between each measurement were calculated as the product of the average daily  
685 generations and the number of days before the next measurement. The total of number  
686 of generations elapsed during the duration of the MA experiment per lineage was then  
687 calculated as the sum of these totals over the course of each MA study (Figure S1).

688 At the conclusion of each of the four MA experiments, gDNA was extracted using  
689 the Wizard Genomic DNA Purification Kit (Promega) from 1 ml of overnight culture  
690 (TSBN at 28° for *V. fischeri*; TSB at 37° for *V. cholerae*) inoculated from 50  
691 representative stored lineages for *Vf*-wt and *Vc*-wt experiments, and all 48 stored  
692 lineages for the *Vf*-mut and *Vc*-mut experiments. For the wild-type MA experiments,  
693 gDNA from the ancestral *V. fischeri* ES114 and *V. cholerae* 2740-80 strains was also  
694 extracted. All libraries were prepared using a modified Illumina Nextera protocol  
695 designed for inexpensive library preparation of microbial genomes (Baym et al. 2015).  
696 Sequencing of the *Vf*-wt and *Vc*-wt lineages and their respective ancestors was

697 performed using the 101-bp paired-end Illumina HiSeq platform at the Beijing Genome  
698 Institute (BGI), while sequencing of the *Vf*-mut and *Vc*-mut lineages was performed  
699 using the 151-bp paired-end Illumina HiSeq platform at the University of New  
700 Hampshire Hubbard Center for Genomic Studies.

701 Our raw fastQ reads were analyzed using fastQC, and revealed that 48 *Vf*-wt  
702 lineages, 49 *Vc*-wt lineages, 19 *Vf*-mut lineages, and 22 *Vc*-mut lineages were  
703 sequenced at sufficient depth to accurately identify bpsm and indel mutations. Our  
704 failure to successfully sequence a high proportion of *Vf*-mut and *Vc*-mut lineages was  
705 mostly generated by a poorly normalized library, leading to limited sequence data for  
706 several of the mutator lineages. For the successfully sequenced lineages, all reads  
707 were mapped to their respective reference genomes with both the Burrows-Wheeler  
708 Aligner (BWA) (Li and Durbin 2009) and Novoalign ([www.novocraft.com](http://www.novocraft.com)). The average  
709 depth of coverage across the successfully sequenced lineages of each MA experiment  
710 was 100x for *Vf*-wt, 96x for *Vc*-wt, 124x for *Vf*-mut, and 92x for *Vc*-mut.

711  
712 **Base-substitution mutation identification.** For all four MA experiments, bpsms were  
713 identified as described previously in an MA experiment with *Burkholderia cenocepacia*  
714 (Dillon et al. 2015). Briefly, we used SAMtools to convert the SAM alignment files from  
715 each lineage to mpileup format (Li et al. 2009), then in-house perl scripts to produce the  
716 forward and reverse read alignments for each position in each line. A three-step  
717 process was then used to detect putative bpsms. First, pooled reads across all lines  
718 were used to generate an ancestral consensus base at each site in the reference  
719 genome. This allows us to correct for any differences that may exist between the



720 reference genomes and the ancestral colony of each our MA experiments. Second, a  
721 lineage specific consensus base was generated at each site in the reference genome  
722 for each individual MA lineage using only the reads from that line. Here, a lineage  
723 specific consensus base was only called if the site was covered by at least two forward  
724 and two reverse reads and at least 80% of the reads identified the same base.  
725 Otherwise, the site was not analyzed. Third, each lineage specific consensus base that  
726 was called was compared to the overall ancestral consensus of the MA experiment and  
727 a putative bpsm was identified if they differed. This analysis was carried out  
728 independently with the alignments generated by BWA and Novoalign, and putative  
729 bpsms were considered genuine only if both pipelines independently identified the bpsm  
730 and they were only identified in a single lineage.

731       Using relatively lenient criteria for identifying lineage specific consensus bases,  
732 we were able to analyze the majority of the genome in all of our lineages, but increase  
733 our risk of falsely identifying bpsms at low coverage sites. Therefore, we generated a  
734 supplementary dataset for all genuine bpsms identified in this study, which includes the  
735 read coverage and consensus at each site where a bpsm was identified  
736 (Supplementary Dataset 1). We do not see clusters of bpsms at the lower limits of our  
737 coverage or consensus requirements. In fact, the vast majority of bpsms in all of four  
738 MA experiments were covered by more than 50 reads and were supported by more  
739 than 95% of the reads that covered the site. Furthermore, we verified that none of the  
740 bpsms that we identified were present in the ancestral *V. fischeri* ES114 and *V.*  
741 *cholerae* 2740-80 strains that we sequenced, so we are confident that nearly all of the



742 bpsms identified in this study were spontaneous bpsms that arose during the mutation  
743 accumulation experiments.

744

745 **Insertion-deletion mutation identification.** All indels identified in this study were also  
746 identified using similar requirements to those described in our MA experiment with *B.*  
747 *cenocepacia* (Dillon et al. 2015), with a few modifications. First, we extracted all putative  
748 indels from the BWA and Novoalign alignments for each lineage under the requirements  
749 that the indel was covered by at least two forward and two reverse reads, and 30% of  
750 those reads identified the exact same indel (size and motif). All putative indels that were  
751 independently identified by both BWA and Novoalign, where 80% of the reads identified  
752 the exact same indel were considered genuine. Next, we noticed that nearly all putative  
753 indels that had been identified with less than 80% consensus were in SSRs. Therefore,  
754 for indels where only 30-80% of the reads identified the exact same indel, we parsed  
755 out only reads that had bases on both the upstream and downstream region of the SSR  
756 (if the indel was in an SSR), and on both the upstream and downstream region of the  
757 indel itself (if the indel was not in an SSR). Using only this subset of reads, we  
758 reassessed the number of reads that identified the exact same indel (size and motif),  
759 and considered these initially low confidence putative indels genuine if more than 80%  
760 of these sub-reads identified the exact same indel. In addition, we passaged our  
761 alignment output through the pattern-growth algorithm PINDEL to identify any large-  
762 scale genuine indels using paired-end information (Ye et al. 2009). Here, we required a  
763 total of 20 reads, with at least 6 forward and 6 reverse reads, and 80% of the reads to  
764 identify the exact same indel for the indel to be considered genuine. This summative

765 collection of genuine indels was then compared to the analysis of the ancestral *V.*  
766 *fischeri* ES114 and *V. cholerae* 2740-80 strains, and any indels that were identified in  
767 their corresponding ancestor, or more than 50% of the analyzed lineages from the  
768 corresponding MA experiment were excluded from subsequent analyses.

769 Our initial filters for indels were even more lenient than those for bpsms, which  
770 could have led to false positive indel identification in the putative indel phase. However,  
771 we subsequently required at least 80% consensus for all genuine indels identified in this  
772 study among reads that had bases covering both the upstream and downstream regions  
773 of putative indels that were not in an SSR. For genuine indels that were in an SSR, we  
774 required at least 80% consensus among reads that had bases covering both the  
775 upstream and downstream regions of the SSR. Further, we verified that all indels  
776 identified were not present in our ancestral *V. fischeri* ES114 or *V. cholerae* 2740-80  
777 strains and were not identified in more than 50% of the other lineages analyzed in the  
778 same MA experiment. As with our bpsms, we generated a supplementary dataset  
779 containing all genuine indels analyzed in this study, which includes read coverage and  
780 consensus of each site where an indel was identified, as well as the read coverage and  
781 consensus among reads with bases covering both the upstream and downstream  
782 regions of the indel or SSR if the initial consensus among reads covering the indel was  
783 below 80% (Supplementary Dataset 2). Thus, we are confident that nearly all indels  
784 identified in this study were genuine spontaneous indels that arose during the mutation  
785 accumulation process.

786

787 **Mutation-rate analyses.** Overall bpsm and indel rates were calculated for each lineage  
788 using the equation:  $\mu = m/nT$ , where  $\mu$  represents the mutation rate,  $m$  represents the  
789 number of mutations observed,  $n$  represents the number of ancestral sites analyzed,  
790 and  $T$  represents the total number of generations elapsed per lineage. Conditional bpsm  
791 rates for each lineage were calculated using the same equation, but with  $m$  representing  
792 the number of bpsms of the focal bpsm type, and  $n$  representing the number analyzed  
793 ancestral sites that could generate the focal bpsm type. All summative bpsm and indel  
794 rates presented for each MA experiment were calculated as the average mutation rate  
795 across all analyzed lineages, while summative standard errors were calculated as the  
796 standard deviation of the mutation rate across all lines ( $s$ ), divided by the square root of  
797 the total number of lines in the corresponding MA experiment ( $N$ ):  $SE_{pooled} = s/\sqrt{N}$ .

798 For our analysis of bpsm and indel rates within chromosomes, we divided each  
799 chromosome into 100 kb intervals, starting at the origin of replication and extending bi-  
800 directionally to the replication terminus. Bpsm rates in each interval were measured by  
801 dividing the total number of bpsm or indel mutations from this study, by the product of  
802 the total number of sites analyzed in each interval across all lines and the number of  
803 generations per line, using the same formula described above for genome wide  
804 mutation rates:  $\mu = m/nT$ . Because none of the chromosomes were exactly divisible by  
805 100 kb, the final intervals on each replicore were always less than 100 kb, but their  
806 mutation rates were calibrated to the number of bases analyzed.

807 Potential effects of selection on observed mutations were assessed as follows.  
808 For each MA experiment, the expected ratio of coding to non-coding mutations was  
809 determined directly from each ancestral reference genome, and the expected ratio of

810 synonymous to nonsynonymous bpsms was calculated from each ancestral reference  
811 genome, after accounting for codon usage and %GC content of synonymous and  
812 nonsynonymous sites.

813

814 **Data availability.** Separate Bioprojects have been generated on NCBI for all  
815 sequencing data that pertains to these *V. fischeri* (PRJNA256340) and *V. cholerae*  
816 (PRJNA256339) MA-WGS projects. Under these Bioprojects, Illumina DNA sequences  
817 for all the *V. fischeri* and *V. cholerae* MA-WGS lines are available under the following  
818 Biosamples: *Vf*-wt = SAMN05366916, *Vc*-wt = SAMN05366910, *Vf*-mut =  
819 SAMN05366917, *Vc*-mut = SAMN05366911. The completed *V. cholerae* 2740-80  
820 genome assembly generated in this study is also available under the Biosample  
821 SAMN05323685. All strains are available upon request.

822

823 **Statistical analyses.** All statistical analyses were performed in R Studio Version  
824 0.99.489 using the Stats analysis package (R Development Core Team 2013).

825

826

## ACKNOWLEDGMENTS

827 We thank Cheryl Whistler and Randi Foxall for their input on creating knockout mutants  
828 in *Vibrio* species, and Brian VanDam for technical support. This work was supported by  
829 the Multidisciplinary University Research Initiative Award from the US Army Research  
830 Office (W911NF-09-1-0444 to ML, P. Foster, H. Tang, and S. Finkel); and the National  
831 Science Foundation Career Award (DEB-0845851 to VSC).

832

## TABLES

**Table 1.** Parameters and observed mutations in the four mutation accumulation experiments.

| MA Lines | Sequenced Lines | Gen. per line | Gen. total | No. of bpsm | No. of indels | Bpsm rate per nucleotide <sup>a</sup> | Bpsm rate per genome <sup>b</sup> | Indel rate per nucleotide <sup>a</sup> | Indel rate per genome <sup>b</sup> |
|----------|-----------------|---------------|------------|-------------|---------------|---------------------------------------|-----------------------------------|----------------------------------------|------------------------------------|
| Vf_wt    | 48              | 5187          | 248976     | 219         | 60            | $2.07 \times 10^{-10}$                | $8.85 \times 10^{-4}$             | $5.68 \times 10^{-11}$                 | $2.43 \times 10^{-4}$              |
| Vc_wt    | 49              | 6453          | 316197     | 138         | 22            | $1.07 \times 10^{-10}$                | $4.38 \times 10^{-4}$             | $1.71 \times 10^{-11}$                 | $6.98 \times 10^{-5}$              |
| Vf_mut   | 19              | 810           | 15390      | 4313        | 382           | $6.57 \times 10^{-8}$                 | $2.81 \times 10^{-1}$             | $5.82 \times 10^{-9}$                  | $2.49 \times 10^{-2}$              |
| Vc_mut   | 22              | 1254          | 27588      | 1022        | 273           | $9.09 \times 10^{-9}$                 | $3.72 \times 10^{-2}$             | $2.43 \times 10^{-9}$                  | $9.93 \times 10^{-3}$              |

<sup>a</sup>Bpsm and indel mutation rates/nucleotide/generation are calculated as the number of observed mutations, divided by the product of sites analyzed and number of generations per lineage. The above estimates represent the average rate across all sequenced lineages.

<sup>b</sup>Bpsm and indel mutation rates/genome/generation are calculated by multiplying the mutation rate/nucleotide/generation in each lineage by the genome size. The above estimates represent the average rate across all sequenced lineages.

**Table 2.** Simple sequence repeats (SSRs) in *Vibrio cholerae* and *Vibrio fischeri* found in coding regions to be mutagenic and associated with gene products whose expression could benefit from population-level plasticity.

| Organism                          | Locus tag      | SSR  | Annotation  | Function (*putative)                                            | PMID     |
|-----------------------------------|----------------|------|-------------|-----------------------------------------------------------------|----------|
| <i>Vibrio cholerae</i><br>2740-80 | vc274080_02054 | 9c   | <i>tcpC</i> | Toxin-coregulated pilus, outer membrane lipoprotein             |          |
|                                   | vc274080_02058 | 7c   | <i>tcpH</i> | Regulator of virulence cascade, associated with phase variation | 9350866  |
|                                   | vc274080_02440 | 8c   | <i>mshQ</i> | MSHA pili biogenesis, associated with biofilm transition        | 15686562 |
|                                   | vc274080_03677 | 9c   | <i>tagE</i> | Cell wall biosynthesis*                                         |          |
|                                   | vc274080_01185 | 9g   | --          | hypothetical                                                    |          |
|                                   | vc274080_01566 | 7c   | --          | CheY-like sensor histidine kinase/response regulator*           |          |
|                                   | vc274080_01721 | 9c   | --          | Diguanylate cyclase*                                            |          |
|                                   | vc274080_01742 | 11c  | --          | Putative lipoprotein*                                           |          |
|                                   | vc274080_02184 | 7c   | --          | Beta-hexosaminidase*                                            |          |
| <i>Vibrio fischeri</i><br>ES114   | VF_0194        | 10a  | <i>wbjE</i> | group 1 glycosyl transferase                                    |          |
|                                   | VF_0587        | 11g  | <i>mltA</i> | murein transglycosylase A                                       |          |
|                                   | VFA_0866       | 3taa | <i>tcpF</i> | toxin coregulated pilus biosynthesis protein TcpF               |          |
|                                   | VFA_0867       | 8t   | <i>tcpE</i> | toxin coregulated pilus biosynthesis protein TcpE               |          |
|                                   | VFA_1130       | 9t   |             | Hypothetical protein*                                           |          |
|                                   | VF_1200        | 9t   |             | Diguanylate cyclase*                                            |          |
|                                   | VF_1672        | 7c   | <i>menF</i> | Isochorismate synthase 2                                        |          |
|                                   | VF_1689        | 9t   | <i>sprE</i> | Proteolytic adapter for RpoS degradation by ClpXP               | 19767441 |
|                                   | VF_2408        | 9t   | <i>vpsT</i> | DNA-binding transcriptional activator                           | 17071756 |

844  
845

## FIGURE LEGENDS

846 **Figure 1.** Wild-type base-substitution (bpsm) and insertion-deletion (indel) mutation  
847 rates and spectra for the two chromosomes of *Vibrio fischeri* and *Vibrio cholerae*; error  
848 bars indicate one standard error of the mean. (A and B) Overall bpsm and indel  
849 mutation rates per base-pair per generation. (C) Conditional bpsm and indel rates per  
850 conditional base-pair per generation, estimated by dividing the number of observed  
851 mutations by the product of the analyzed sites capable of producing a given mutation  
852 and the number of generations of mutation accumulation in each lineage.

853  
854 **Figure 2.** Relative frequency of insertion-deletion mutations (indels) of different lengths  
855 observed in the wild-type (wt) and mismatch repair deficient (mut) strains of *Vibrio*  
856 *fischeri* (A) and *Vibrio cholerae* (B). Note that the overall indel rates of Vf-mut and Vc-  
857 mut are 102-fold and 142-fold higher than the wild-type rates, respectively, but it is the  
858 relative frequencies of different indel lengths that are shown here. The increase in the  
859 number of single-nucleotide indels in mutator lines is significant (Vf-mut:  $\chi^2 = 5.460 \cdot$   
860  $10^3$ , d.f. = 1,  $p < 0.0001$ ; Vc-mut:  $\chi^2 = 2.567 \cdot 10^3$ , d.f. = 1,  $p < 0.0001$ ).

861  
862 **Figure 3.** Wild-type insertion-deletion mutation (indel) rates per run per generation and  
863 frequencies in simple-sequence repeats (SSRs) containing three or more repeats in  
864 *Vibrio fischeri*. SSRs were categorized by the length of the repeated unit and indel rates  
865 per run per generation were calculated as the number of observed indels in that SSR  
866 category, divided by the product of the occurrence of that SSR type in the genome, the  
867 number of generations, and the number of MA lineages analyzed. Expected frequencies  
868 were calculated based on the target size of each SSR category in the genome.

869  
870 **Figure 4.** Mismatch repair deficient conditional base-substitution (bpsm) and insertion-  
871 deletion (indel) mutation rates per conditional base-pair per generation for *Vibrio fischeri*  
872  $\Delta mutS$  and *Vibrio cholerae*  $\Delta mutS$  mutation accumulation lines, estimated by dividing  
873 the number of observed mutations by the product of the analyzed sites capable of  
874 producing a given mutation and the number of generations of mutation accumulation in  
875 each lineage.

876  
877 **Figure 5.** Mismatch repair deficient insertion-deletion mutation (indel) rates per run per  
878 generation and frequencies in homopolymer repeats containing three or more repeats  
879 for *Vibrio fischeri*  $\Delta mutS$  (A) and *Vibrio cholerae*  $\Delta mutS$  (B). Indel rates per run per  
880 generation were calculated as the number of observed indels in each homopolymer  
881 length category, divided by the product of the occurrence of homopolymers of that  
882 length in the genome, the number of generations, and the number of MA lineages  
883 analyzed. Expected frequencies were calculated based on the genome target size for  
884 each homopolymer length.

885  
886 **Figure 6.** Base-substitution (bpsm) and insertion-deletion (indel) mutation rates per  
887 base-pair per generation in 100kb intervals extending bi-directionally from the origin of  
888 replication (*OriC*) for all mutation accumulation (MA) experiments in this study. Outer

889 rings on each chromosome represent the mutator MA experiment and inner rings  
890 represent the corresponding wild-type MA experiment. A) Bpsm rates of *Vf*-wt and *Vf*-  
891 mut; B) Bpsm rates of *Vc*-wt and *Vc*-mut; C) Indel rates of *Vf*-wt and *Vf*-mut; D) Indel  
892 rates of *Vc*-wt and *Vc*-mut.



## REFERENCES

- Agier N, Fischer G. 2012. The mutational profile of the yeast genome is shaped by replication. *Mol. Biol. Evol.* 29:905–913.
- Baym M, Kryazhimskiy S, Lieberman TD, Chung H, Desai MM, Kishony R. 2015. Inexpensive multiplexed library preparation for megabase-sized genomes. *PLoS One* 10:e0128036.
- Beaulaurier J, Zhang X, Zhu S, Sebra R, Rosenbluh C, Deikus G, Shen N, Munera D, Waldor MK, Chess A, et al. 2015. Single molecule-level detection and long read-based phasing of epigenetic variations in bacterial methylomes. *Nat. Commun.* 6:7438.
- Behringer MG, Hall DW. 2016. The repeatability of genome-wide mutation rate and spectrum estimates. *Curr. Genet.* 1:1–6.
- van Belkum A, Scherer S, van Alphen L, Verbrugh H. 1998. Short-sequence DNA repeats in prokaryotic genomes. *Microbiol. Mol. Biol. Rev.* 62:275–293.
- Brenner DJ, Krieg NR, Staley JT, Garrity GM. 2005. *Bergey's Manual of Systematic Bacteriology*. 2nd ed. New York: Springer-Verlag
- Carroll P a, Tashima KT, Rogers MB, DiRita VJ, Calderwood SB. 1997. Phase variation in *tcpH* modulates expression of the ToxR regulon in *Vibrio cholerae*. *Mol. Microbiol.* 25:1099–1111.
- Chen C-L, Rappailles A, Duquenne L, Huvet M, Guilbaud G, Farinelli L, Audit B, D'Aubenton-Carafa Y, Arneodo A, Hyrien O, et al. 2010. Impact of replication timing on non-CpG and CpG substitution rates in mammalian genomes. *Genome Res.* 20:447–457.
- Chin C-S, Alexander DH, Marks P, Klammer AA, Drake J, Heiner C, Clum A, Copeland A, Huddleston J, Eichler EE, et al. 2013. Nonhybrid, finished microbial genome assemblies from long-read SMRT sequencing data. *Nat. Methods* 10:563–569.
- Cooper VS, Vohr SH, Wrocklage SC, Hatcher PJ. 2010. Why genes evolve faster on secondary chromosomes in bacteria. *Plos Comput. Biol.* 6:e1000732.
- Couce A, Guelfo J, Blazquez J. 2013. Mutational spectrum drives the rise of mutator bacteria. *Plos Genet.* 9:e1003167.

- 19 Couce A, Rodriguez-Rojas A, Blazquez J. 2015. Bypass of genetic constraints during mutator  
20 evolution to antibiotic resistance. *Proc. R. Soc. London Ser. B-Biological Sci.* 282:20142698.
- 21 Danin-Poleg Y, Cohen LA, Gancz H, Broza YY, Goldshmidt H, Malul E, Valinsky L, Lerner L, Broza  
22 M, Kashi Y. 2007. *Vibrio cholerae* strain typing and phylogeny study based on simple sequence  
23 repeats. *J. Clin. Microbiol.* 45:736–746.
- 24 Datsenko KA, Wanner BL. 2000. One-step inactivation of chromosomal genes in *Escherichia coli* K-  
25 12 using PCR products. *Proc. Natl. Acad. Sci. U. S. A.* 97:6640–6645.
- 26 Denver DR, Dolan PC, Wilhelm LJ, Sung W, Lucas-Lledo JI, Howe DK, Lewis SC, Okamoto K,  
27 Thomas WK, Lynch M, et al. 2009. A genome-wide view of *Caenorhabditis elegans* base-  
28 substitution mutation processes. *Proc. Natl. Acad. Sci. U. S. A.* 106:16310–16314.
- 29 Dettman JR, Sztepanacz JL, Kassen R. 2016. The properties of spontaneous mutations in the  
30 opportunistic pathogen *Pseudomonas aeruginosa*. *BMC Genomics* 17:27–41.
- 31 Dillon MM, Sung W, Lynch M, Cooper VS. 2015. The rate and molecular spectrum of spontaneous  
32 mutations in the GC-rich multichromosome genome of *Burkholderia cenocepacia*. *Genetics*  
33 200:935–946.
- 34 Duigou S, Knudsen KG, Skovgaard O, Egan ES, Lobner-Olesen A, Waldor MK. 2006. Independent  
35 control of replication initiation of the two *Vibrio cholerae* chromosomes by DnaA and RctB. *J.*  
36 *Bacteriol.* 188:6419–6424.
- 37 Egan ES, Waldor MK. 2003. Distinct replication requirements for the two *Vibrio cholerae*  
38 chromosomes. *Cell* 114:521–530.
- 39 Enos-Berlage JL, Guvener ZT, Keenan CE, McCarter LL. 2005. Genetic determinants of biofilm  
40 development of opaque and translucent *Vibrio parahaemolyticus*. *Mol. Microbiol.* 55:1160–1182.
- 41 Field D, Magnasco MO, Moxon ER, Metzgar D, Tanaka MM, Wills C, Thaler DS. 1999. Contingency  
42 loci, mutator alleles, and their interactions: Synergistic strategies for microbial evolution and  
43 adaptation in pathogenesis. *Mol. Strateg. Biol. Evol.* 870:378–382.
- 44 Foster PL, Hanson AJ, Lee H, Popodi EM, Tang HX. 2013. On the mutational topology of the

- 15 bacterial genome. *G3-Genes Genomes Genet.* 3:399–407.
- 16 Gao F, Luo H, Zhang CT. 2013. DoriC 5.0: an updated database of *oriC* regions in both bacterial and  
17 archaeal genomes. *Nucleic Acids Res.* 41:D90–D93.
- 18 Gao F, Zhang C-T. 2008. Ori-Finder: a web-based system for finding *oriCs* in unannotated bacterial  
19 genomes. *BMC Bioinformatics* 9:79–85.
- 20 Ghosh R, Nair GB, Tang L, Morris JG, Sharma NC, Ballal M, Garg P, Ramamurthy T, Stine OC.  
21 2008. Epidemiological study of *Vibrio cholerae* using variable number of tandem repeats. *FEMS*  
22 *Microbiol. Lett.* 288:196–201.
- 23 Goldberg S, Murphy JR. 1983. Molecular epidemiological-studies of United-States gulf-coast *Vibrio*  
24 *cholerae* strains - integration site of mutator *Vibriophage Vca-3*. *Infect. Immun.* 42:224–230.
- 25 Graf J, Dunlap P V., Ruby EG. 1994. Effect of transposon-induced motility mutations on colonization  
26 of the host light organ by *Vibrio fischeri*. *J. Bacteriol.* 176:6986–6991.
- 27 Hall LMC, Henderson-Begg SK. 2006. Hypermutable bacteria isolated from humans - a critical  
28 analysis. *Microbiology* 152:2505–2514.
- 29 Hazen TH, Kennedy KD, Chen S, Yi S V., Sobecky PA. 2009. Inactivation of mismatch repair  
30 increases the diversity of *Vibrio parahaemolyticus*. *Environ. Microbiol.* 11:1254–1266.
- 31 Heckman KL, Pease LR. 2007. Gene splicing and mutagenesis by PCR-driven overlap extension. *Nat*  
32 *Protoc* 2:924–932.
- 33 Heidelberg JF, Eisen JA, Nelson WC, Clayton RA, Gwinn ML, Dodson RJ, Haft DH, Hickey EK,  
34 Peterson JD, Umayam L, et al. 2000. DNA sequence of both chromosomes of the cholera  
35 pathogen *Vibrio cholerae*. *Nature* 406:477–483.
- 36 Heilbron K, Toll-Riera M, Kojadinovic M, Maclean RC. 2014. Fitness is strongly influenced by rare  
37 mutations of large effect in a microbial mutation accumulation experiment. *Genetics* 197:981–  
38 990.
- 39 Hershberg R, Petrov DA. 2010. Evidence that mutation is universally biased towards AT in bacteria.  
40 *PLoS Genet.* 6:e1001115.

- 71 Hildebrand F, Meyer A, Eyre-Walker A. 2010. Evidence of selection upon genomic GC-content in  
72 bacteria. PLoS Genet. 6:e1001107.
- 73 Koren S, Phillippy AM. 2015. One chromosome, one contig: complete microbial genomes from long-  
74 read sequencing and assembly. Curr. Opin. Microbiol. 23:110–120.
- 75 Kunkel TA, Erie DA. 2005. DNA mismatch repair. Annu. Rev. Biochem. 74:681–710.
- 76 Lassalle F, Périan S, Bataillon T, Nesme X, Duret L, Daubin V. 2015. GC-content evolution in  
77 bacterial genomes: the biased gene conversion hypothesis expands. PLOS Genet. 11:e1004941.
- 78 Lee H, Popodi E, Tang HX, Foster PL. 2012. Rate and molecular spectrum of spontaneous mutations  
79 in the bacterium *Escherichia coli* as determined by whole-genome sequencing. Proc. Natl. Acad.  
80 Sci. U. S. A. 109:E2774–E2783.
- 81 Li H, Durbin R. 2009. Fast and accurate short read alignment with Burrows-Wheeler transform.  
82 Bioinformatics 25:1754–1760.
- 83 Li H, Handsaker B, Wysoker A, Fennell T, Ruan J, Homer N, Marth G, Abecasis G, Durbin R. 2009.  
84 The sequence alignment/map format and SAMtools. Bioinformatics 25:2078–2079.
- 85 Lind PA, Andersson DI. 2008. Whole-genome mutational biases in bacteria. Proc. Natl. Acad. Sci. U.  
86 S. A. 105:17878–17883.
- 87 Long H, Kucukyildirim S, Sung W, Williams E, Lee H, Ackerman M, Doak TG, Tang H, Lynch M.  
88 2015. Background mutational features of the radiation-resistant bacterium *Deinococcus*  
89 *radiodurans*. Mol. Biol. Evol. 32:2383–2392.
- 90 Long H, Sung W, Miller SF, Ackerman MS, Doak TG, Lynch M. 2014. Mutation rate, spectrum,  
91 topology, and context-dependency in the DNA mismatch repair (MMR) deficient *Pseudomonas*  
92 *fluorescens* ATCC948. Genome Biol. Evol. 7:262–271.
- 93 Lyer RR, Pluciennik A, Burdett V, Modrich PL. 2006. DNA mismatch repair: Functions and  
94 mechanisms. Chem. Rev. 106:302–323.
- 95 Lynch M, Sung W, Morris K, Coffey N, Landry CR, Dopman EB, Dickinson WJ, Okamoto K, Kulkarni  
96 S, Hartl DL, et al. 2008. A genome-wide view of the spectrum of spontaneous mutations in yeast.

- 07 Proc. Natl. Acad. Sci. U. S. A. 105:9272–9277.
- 08 Lynch M. 2010. Evolution of the mutation rate. Trends Genet. 26:345–352.
- 09 Lynch M. 2011. The lower bound to the evolution of mutation rates. Genome Biol. Evol. 3:1107–1118.
- 10 Martincorena I, Seshasayee ASN, Luscombe NM. 2012. Evidence of non-random mutation rates  
11 suggests an evolutionary risk management strategy. Nature 485:95–98.
- 12 Marvig RL, Johansen HK, Molin S, Jelsbak L. 2013. Genome analysis of a transmissible lineage of  
13 *Pseudomonas aeruginosa* reveals pathoadaptive mutations and distinct evolutionary paths of  
14 hypermutators. PLoS Genet. 9:e1003741.
- 15 Mena A, Smith EE, Burns JL, Speert DP, Moskowitz SM, Perez JL, Oliver A. 2008. Genetic  
16 adaptation of *Pseudomonas aeruginosa* to the airways of cystic fibrosis patients is catalyzed by  
17 hypermutation. J. Bacteriol. 190:7910–7917.
- 18 Mira A, Ochman H. 2002. Gene location and bacterial sequence divergence. Mol. Biol. Evol.  
19 19:1350–1358.
- 20 Morrow JD, Cooper VS. 2012. Evolutionary effects of translocations in bacterial genomes. Genome  
21 Biol. Evol. 4:1256–1262.
- 22 Moxon ER, Rainey PB, Nowak MA, Lenski RE. 1994. Adaptive evolution of highly mutable loci in  
pathogenic bacteria. Curr. Biol. 4:24–33.
- Moxon R, Bayliss C, Hood D. 2006. Bacterial contingency loci: the role of simple sequence DNA  
repeats in bacterial adaptation. Annu. Rev. Genet. 40:307–333.
- Oliver A. 2010. Mutators in cystic fibrosis chronic lung infection: Prevalence, mechanisms, and  
consequences for antimicrobial therapy. Int J Med Microbiol 300:563–572.
- Ossowski S, Schneeberger K, Lucas-Lledo JI, Warthmann N, Clark RM, Shaw RG, Weigel D, Lynch  
M. 2010. The rate and molecular spectrum of spontaneous mutations in *Arabidopsis thaliana*.  
Science 327:92–94.
- R Development Core Team. 2013. R: A Language and Environment for Statistical Computing.
- Rasmussen T, Jensen RB, Skovgaard O. 2007. The two chromosomes of *Vibrio cholerae* are initiated

- 23 at different time points in the cell cycle. *Embo J.* 26:3124–3131.
- 24 Reyes GX, Schmidt TT, Kolodner RD, Hombauer H. 2015. New insights into the mechanism of DNA  
25 mismatch repair. *Chromosoma* 124:443–462.
- 26 Ruby EG, Urbanowski M, Campbell J, Dunn A, Faini M, Gunsalus R, Lostroh P, Lupp C, McCann J,  
27 Millikan D, et al. 2005. Complete genome sequence of *Vibrio fischeri*: A symbiotic bacterium with  
28 pathogenic congeners. *Proc. Natl. Acad. Sci. U. S. A.* 102:3004–3009.
- 29 Sambrook J, Fritsch EF, Maniatis T. 1989. *Molecular Cloning: A Laboratory Manual*. New York
- 30 Sawabe T, Koizumi S, Fukui Y, Nakagawa S, Ivanova EP, Kita-Tsukamoto K, Kogure K, Thompson  
31 FL. 2009. Mutation is the main driving force in the diversification of the *Vibrio splendidus* clade.  
32 *Microbes Environ.* 24:281–285.
- 33 Schoolnik GK, Yildiz FH. 2000. The complete genome sequence of *Vibrio cholerae*: a tale of two  
34 chromosomes and of two lifestyles. *Genome Biol.* 1:reviews1016.1–1016.3.
- 35 Schrider DR, Houle D, Lynch M, Hahn MW. 2013. Rates and genomic consequences of spontaneous  
36 mutational events in *Drosophila melanogaster*. *Genetics* 194:937–954.
- 37 Seemann T. 2014. Prokka: Rapid prokaryotic genome annotation. *Bioinformatics* 30:2068–2069.
- 38 Sharp PM, Shields DC, Wolfe KH, Li WH. 1989. Chromosomal location and evolutionary rate  
39 variation in enterobacterial genes. *Science* 246:808–810.
- 40 Sniegowski PD, Gerrish PJ, Lenski RE. 1997. Evolution of high mutation rates in experimental  
41 populations of *E. coli*. *Nature* 387:703–705.
- 42 Soto W, Rivera FM, Nishiguchi MK. 2014. Ecological diversification of *Vibrio fischeri* serially  
43 passaged for 500 generations in novel squid host *Euprymna tasmanica*. *Microb. Ecol.* 67:700–  
44 721.
- 45 Stabb E V., Ruby EG. 2002. RP4-based plasmids for conjugation between *Escherichia coli* and  
46 members of the *Vibrionaceae*. *Methods Enzymol.* 358:413–426.
- 47 Stamatoyannopoulos JA, Adzhubei I, Thurman RE, Kryukov G V, Mirkin SM, Sunyaev SR. 2009.  
48 Human mutation rate associated with DNA replication timing. *Nat. Genet.* 41:393–395.

- 19 Stokke C, Waldminghaus T, Skarstad K. 2011. Replication patterns and organization of replication  
20 forks in *Vibrio cholerae*. *Microbiology* 157:695–708.
- 21 Sung W, Ackerman MS, Dillon MM, Platt TG, Fuqua C, Cooper VS, Lynch M. 2016. Evolution of the  
22 insertion-deletion mutation rate across the tree of life. *G3-Genes Genomes Genet.* In Press.
- 23 Sung W, Ackerman MS, Gout J-F, Miller SF, Williams E, Foster PL, Lynch M. 2015. Asymmetric  
24 context-dependent mutation patterns revealed through mutation-accumulation experiments. *Mol.*  
25 *Biol. Evol.* 32:1672–1683.
- 26 Sung W, Ackerman MS, Miller SF, Doak TG, Lynch M. 2012. Drift-barrier hypothesis and mutation-  
27 rate evolution. *Proc. Natl. Acad. Sci. U. S. A.* 109:18488–18492.
- 28 Sung W, Tucker AE, Doak TG, Choi E, Thomas WK, Lynch M. 2012. Extraordinary genome stability  
29 in the ciliate *Paramecium tetraurelia*. *Proc. Natl. Acad. Sci.* 109:19339–19344.
- 30 Thompson FL, Iida T, Swings J. 2004. Biodiversity of *Vibrios*. *Microbiol. Mol. Biol. Rev.* 68.
- 31 Val ME, Skovgaard O, Ducos-Galand M, Bland MJ, Mazel D. 2012. Genome engineering in *Vibrio*  
32 *cholerae*: A feasible approach to address biological issues. *Plos Genet.* 8:e1002472.
- 33 Vos M, Didelot X. 2009. A comparison of homologous recombination rates in bacteria and archaea.  
34 *ISME J.* 3:199–208.
- 35 Waldor MK, RayChaudhuri D. 2000. Treasure trove for cholera research. *Nature* 406:469–470.
- 36 Wollenberg MS, Ruby EG. 2012. Phylogeny and fitness of *Vibrio fischeri* from the light organs of  
37 *Euprymna scolopes* in two Oahu, Hawaii populations. *ISME J.* 6:352–362.
- 38 Xu X, Peng M, Fang Z. 2000. The direction of microsatellite mutations is dependent upon allele  
39 length. *Nat. Genet.* 24:396–399.
- 40 Ye K, Schulz MH, Long Q, Apweiler R, Ning ZM. 2009. Pindel: a pattern growth approach to detect  
41 break points of large deletions and medium sized insertions from paired-end short reads.  
42 *Bioinformatics* 25:2865–2871.
- 43 Yildiz FH, Visick KL. 2009. *Vibrio* biofilms: so much the same yet so different. *Trends Microbiol.*  
44 [Internet] 17:109–118. Available from: <Go to ISI>://000264681800004



- 75 Zhang XL, Mathews CK. 1995. Natural DNA precursor pool asymmetry and base sequence context  
76 as determinants of replication fidelity. *J. Biol. Chem.* 270:8401–8404.
- 77 Zhu YO, Siegal ML, Hall DW, Petrov DA. 2014. Precise estimates of mutation rate and spectrum in  
78 yeast. *Proc. Natl. Acad. Sci. U. S. A.* 111:E2310–E2318.

79



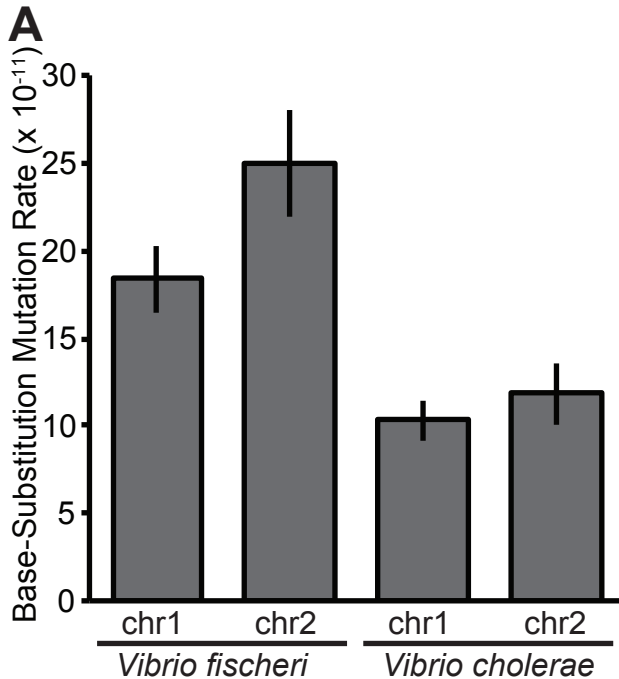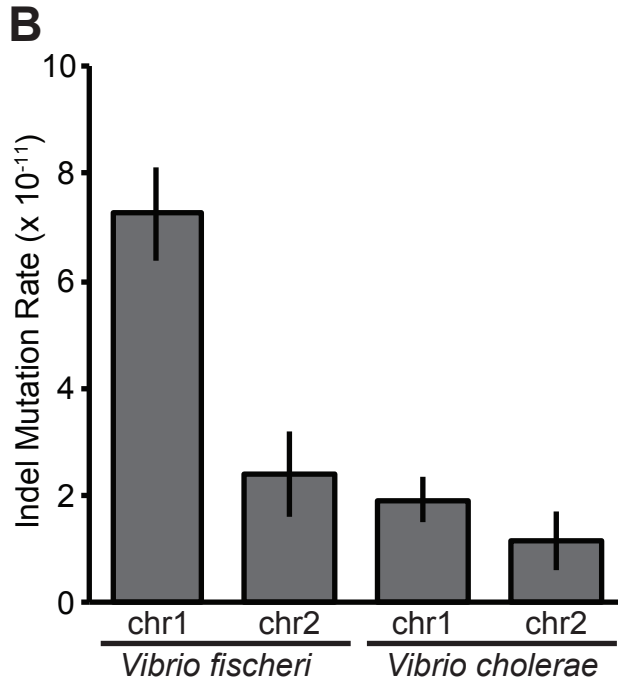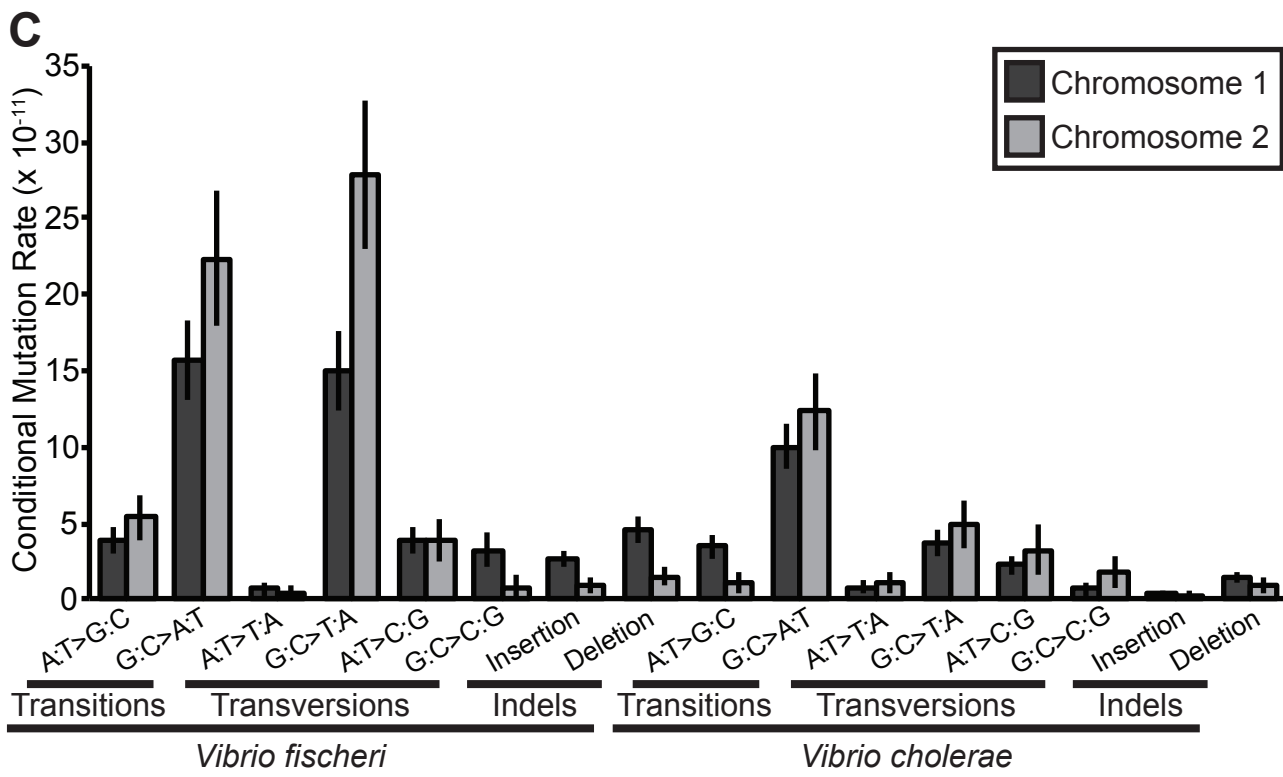

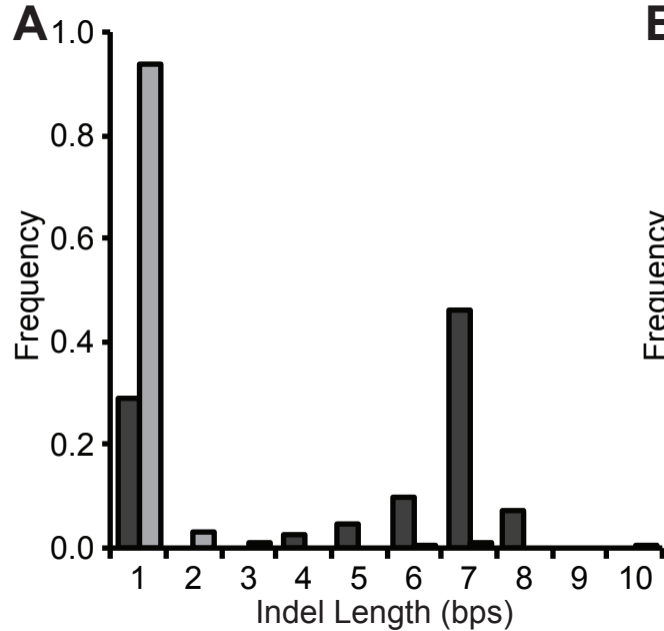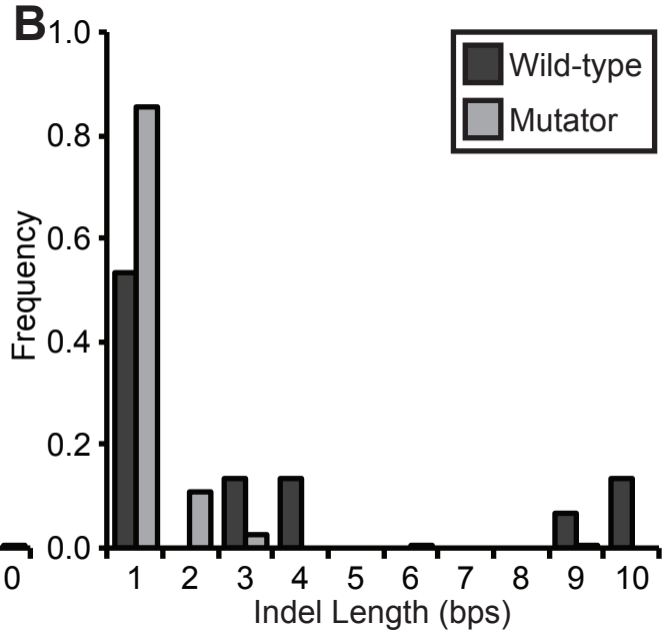

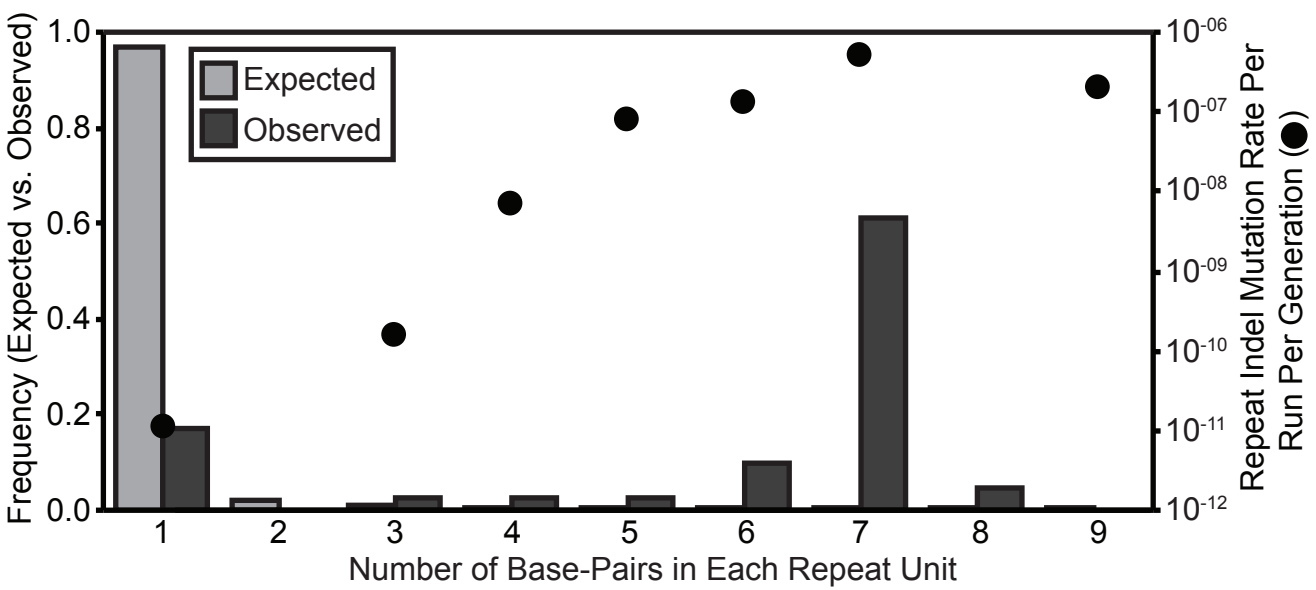

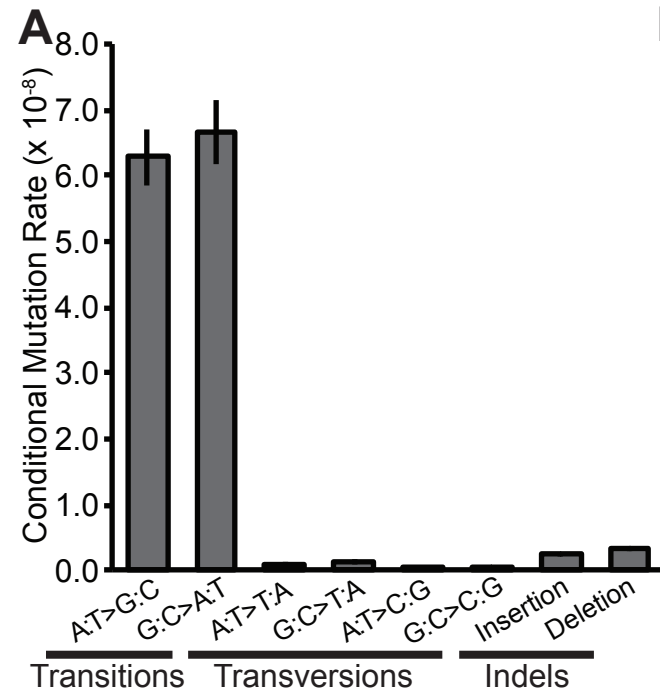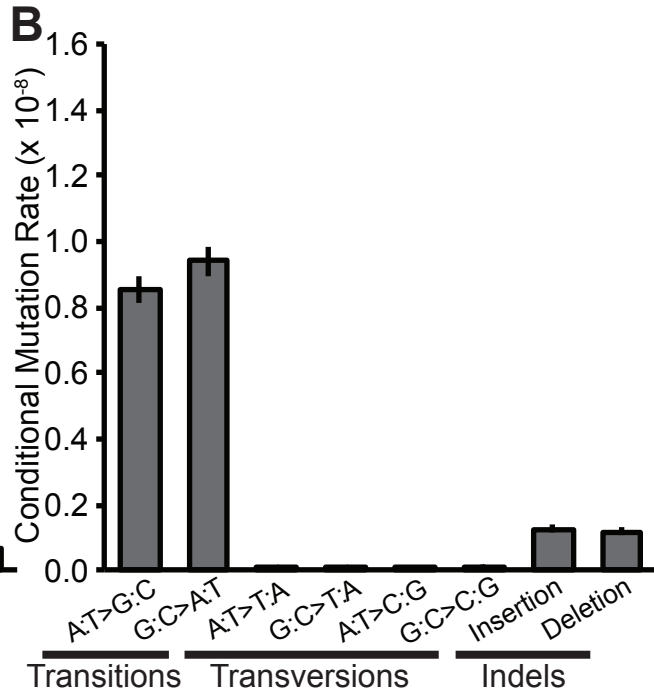

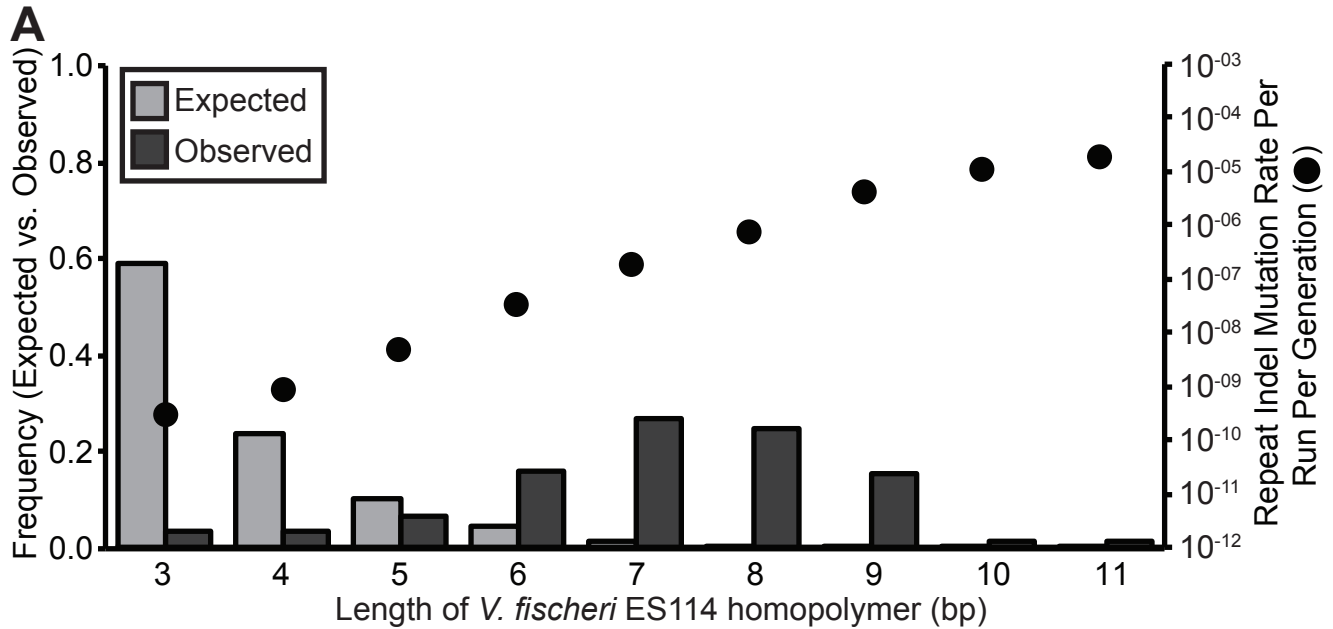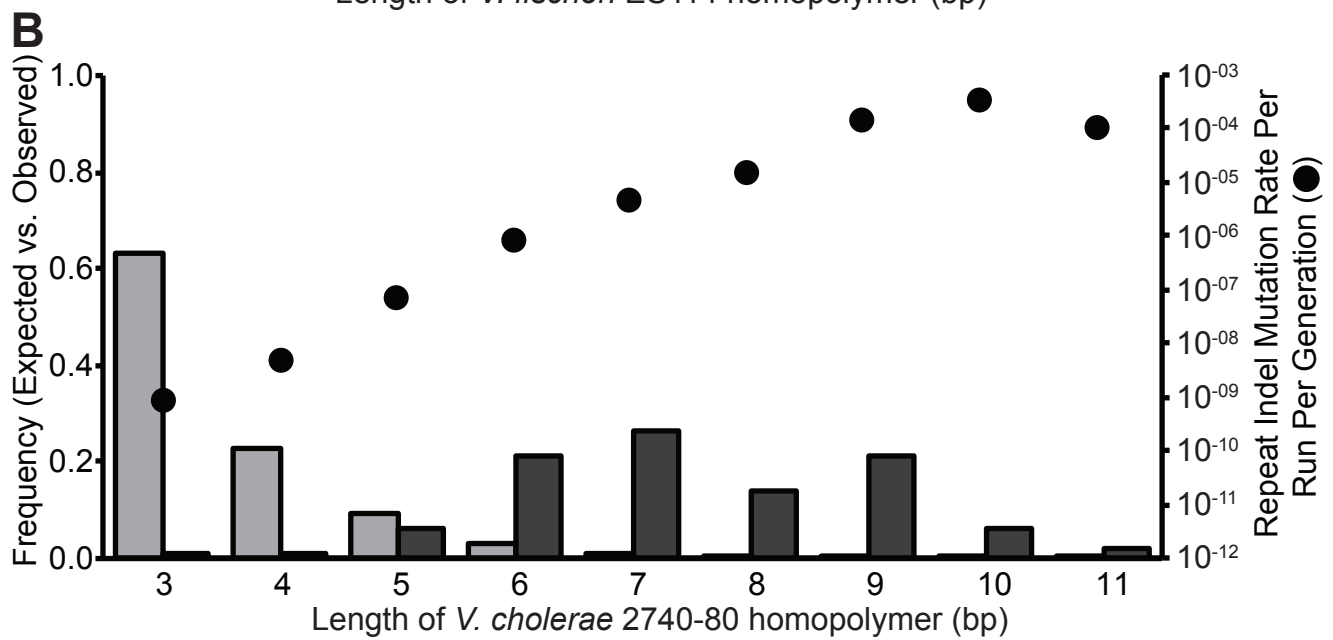

# *Vibrio fischeri*

# *Vibrio cholerae*

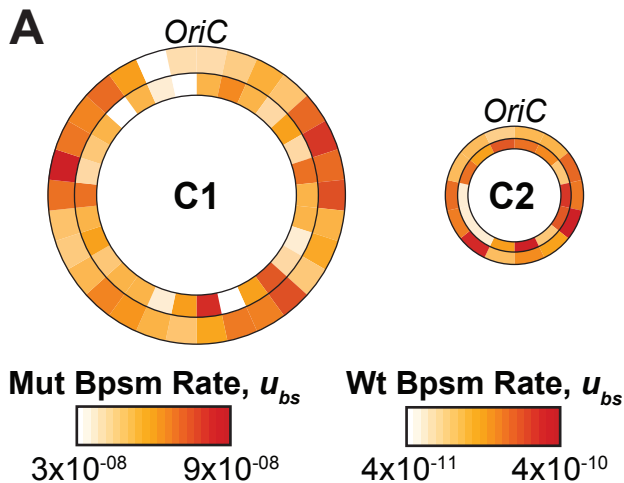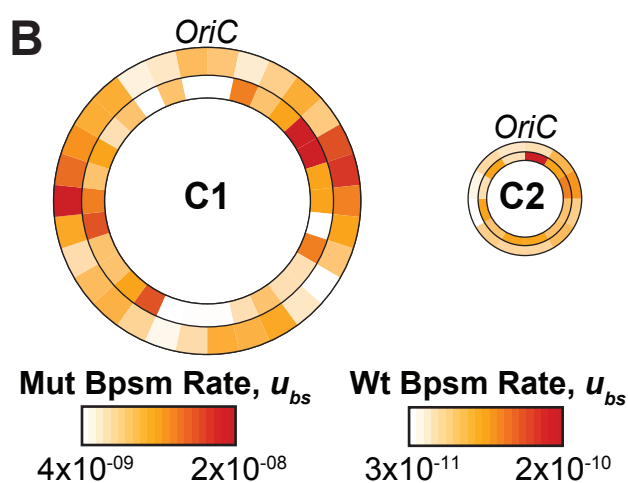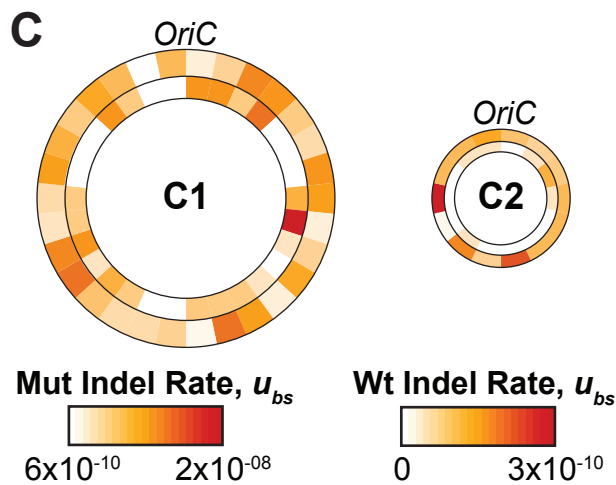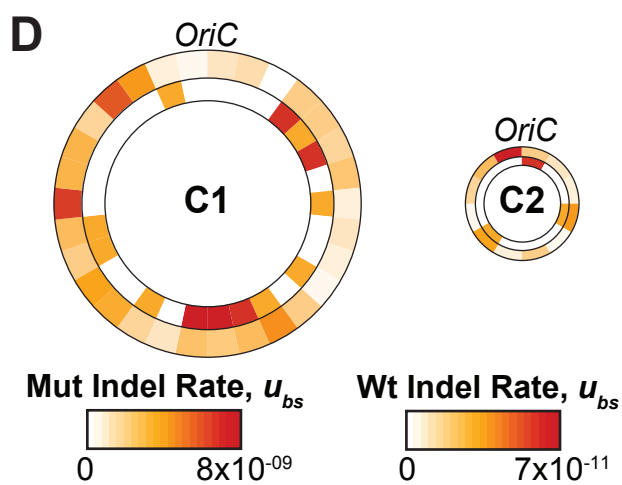

Source: http://biorxiv.org/content/10.1101/066829v1.full.pdf
